1 **Dissecting molecular regulatory mechanisms underlying noncoding**  
2 **susceptibility SNPs associated with 19 autoimmune diseases using**  
3 **multi-omics integrative analysis**

4 Xiao-Feng Chen<sup>1</sup>, Min-Rui Guo<sup>1</sup>, Yuan-Yuan Duan<sup>1</sup>, Feng Jiang<sup>1</sup>, Hao Wu<sup>1</sup>, Shan-  
5 Shan Dong<sup>1</sup>, Hlaing Nwe Thynn<sup>1</sup>, Cong-Cong Liu<sup>1</sup>, Lin Zhang<sup>1</sup>, Yan Guo<sup>1\*</sup>, Tie-Lin  
6 Yang<sup>1,\*</sup>

7

8 <sup>1</sup> Key Laboratory of Biomedical Information Engineering of Ministry of Education,  
9 and Biomedical Informatics & Genomics Center, School of Life Science and  
10 Technology, Xi'an Jiaotong University, Xi'an 710049, P. R. China

11

12 \*Correspondence: [yangtielin@mail.xjtu.edu.cn](mailto:yangtielin@mail.xjtu.edu.cn). Correspondence may also be  
13 addressed to Yan Guo: [guoyan253@mail.xjtu.edu.cn](mailto:guoyan253@mail.xjtu.edu.cn).

## 14 **Abstract**

15 The genome-wide association studies (GWAS) have identified hundreds of  
16 susceptibility loci associated with autoimmune diseases. However, over 90% of risk  
17 variants are located in the noncoding regions, leading to great challenges in  
18 deciphering the underlying causal functional variants/genes and biological  
19 mechanisms. Previous studies focused on developing new scoring method to  
20 prioritize functional/disease-relevant variants. However, they principally  
21 incorporated annotation data across all cells/tissues while omitted the cell-specific or  
22 context-specific regulation. Moreover, limited analyses were performed to dissect the  
23 detailed molecular regulatory circuits linking functional GWAS variants to disease  
24 etiology. Here we devised a new analysis frame that incorporate hundreds of immune  
25 cell-specific multi-omics data to prioritize functional noncoding susceptibility SNPs  
26 with gene targets and further dissect their downstream molecular mechanisms and  
27 clinical applications for 19 autoimmune diseases. Most prioritized SNPs have genetic  
28 associations with transcription factors (TFs) binding, histone modification or  
29 chromatin accessibility, indicating their allelic regulatory roles on target genes. Their  
30 target genes were significantly enriched in immunologically related pathways and  
31 other immunologically related functions. We also detected long-range regulation on  
32 90.7% of target genes including 132 ones exclusively regulated by distal SNPs (eg,  
33 *CD28*, *IL2RA*), which involves several potential key TFs (eg, CTCF), suggesting the  
34 important roles of long-range chromatin interaction in autoimmune diseases.  
35 Moreover, we identified hundreds of known or predicted druggable genes, and  
36 predicted some new potential drug targets for several autoimmune diseases, including  
37 two genes (*NFKB1*, *SH2B3*) with known drug indications on other diseases,  
38 highlighting their potential drug repurposing opportunities. In summary, our analyses  
39 may provide unique resource for future functional follow-up and drug application on  
40 autoimmune diseases, which are freely available at <http://fngwas.online/>.

41

42

## 43 **Author Summary**

44 Autoimmune diseases are groups of complex immune system disorders with high  
45 prevalence rates and high heritabilities. Previous studies have unraveled thousands  
46 of SNPs associated with different autoimmune diseases. However, it remains largely  
47 unknown on the molecular mechanisms underlying these genetic associations.  
48 Striking, over 90% of risk SNPs are located in the noncoding region. By leveraging  
49 multiple immune cell-specific multi-omics data across genomic, epigenetic,  
50 transcriptomic and 3D chromatin interaction information, we systematically analyzed  
51 the functional variants/genes and biological mechanisms underlying genetic  
52 association on 19 autoimmune diseases. We found that most functional SNPs may  
53 affect target gene expression through altering transcription factors (TFs) binding,  
54 histone modification or chromatin accessibility. Most target genes had known  
55 immunological functions. We detected prevailing long-range chromatin interaction  
56 linking distal functional SNPs to target genes. We also identified many known drug  
57 targets and predicted some new drug target genes for several autoimmune diseases,  
58 suggesting their potential clinical applications. All analysis results and tools are  
59 available online, which may provide unique resource for future functional follow-up  
60 and drug application. Our study may help reduce the gap between traditional genetic  
61 findings and biological mechanistically exploration of disease etiologies as well as  
62 clinical drug development.

63

## 64 **Keyword**

65 Autoimmune diseases; GWAS; Noncoding; Chromatin interaction; Molecular  
66 mechanisms; Drug repurposing

67

## 68 **Introduction**

69 Autoimmune diseases are groups of complex immune system disorders with high  
70 prevalence rates worldwide (4.5%) [1]. High heritabilities were observed on various

71 autoimmune diseases (~60%-90%) [2]. To date, genome-wide association studies  
72 (GWASs) have unraveled hundreds of susceptible loci associated with autoimmune  
73 diseases [3, 4], suggesting many functional genes involved in some key  
74 immunological pathways (eg. *MHC* gene clusters in antigen presentation, *TYK2* in  
75 cytokine signals) [5]. However, the true functional variants and target genes for the  
76 most of GWASs variants remain largely unknown [5], which might be mainly limited  
77 by two challenges. Firstly, the detected variants may be in linkage disequilibrium (LD)  
78 with causal functional SNPs without genotyping. Secondly, over 90% of GWASs  
79 variants are located in the uncultivated noncoding regions, complicating their  
80 functional interpretation.

81

82 In the past few years, many studies have integrated functional epigenetic data to  
83 predict function of noncoding SNPs. Many of these methods such as CADD [6],  
84 DeepSEA [7], GWAVA [8], FATHMM-MKL [9], ReMM [10] and FIRE [11], adopted  
85 machine learning algorithms to develop classifiers through integrating various  
86 annotations and labelled training data to distinguish potential functional/non-  
87 functional SNPs. However, the prior labelled training data may be inaccurate and  
88 impractical due to the current knowledge limitation in functional roles underlying  
89 noncoding SNPs. Some other methods like RegulomeDB [12], 3DSNP [13],  
90 GWAS4D [14], IW-Scoring [15], Eigen [16], and FunSeq2 [17] either directly  
91 combined various epigenetic/regulatory features to rank SNP functionality or adopted  
92 a weighted scoring scheme by considering the relative importance of each feature to  
93 assign SNP functionality scores. However, these approaches principally incorporated  
94 epigenetic or transcriptional annotation across all cells or tissues, while omitting the  
95 cell-specific or context-specific regulation. Besides, they mainly aimed to prioritize  
96 potential functional variants rather than dissect the downstream regulatory circuits  
97 linking functional variants to disease etiology. Autoimmune diseases associated  
98 variants are significantly enriched in blood cell-specific enhancers [18], implying that  
99 the integration of cell-specific functional data are required for dissecting molecular  
100 regulatory mechanisms underlying noncoding variants associated with autoimmune

101 diseases.

102

103 The incorporation of cell-specific multi-omics data has remarkably accelerated the  
104 decryption of functional mechanisms underlying noncoding GWAS variants [19]. For  
105 example, we recently identified a functional SNP associated with two autoimmune  
106 diseases exerted allele-specific enhancer regulation on *IRF5* expression through long-  
107 rang loop formation [20]. Nevertheless, these studies primarily focused on one  
108 GWAS susceptibility loci on one disease, and only limited functional causal variants  
109 predisposing to autoimmune diseases have been validated [20]. The autoimmune  
110 diseases share substantial common susceptibility variants and immunopathology [21].  
111 It is necessary and important to decipher the functions of GWAS noncoding variants  
112 systematically, which is helpful to accelerate the translation from GWASs findings  
113 into useful biological and clinical insights into autoimmune diseases.

114

115 To address these issues, we devised a new analysis frame to prioritize potential  
116 functional noncoding SNPs on 19 autoimmune diseases and further predicted their  
117 local and distal regulatory target genes using epigenetic, transcriptional and 3D  
118 chromatin interaction data across hundreds of blood immune cell types. Our analysis  
119 contains a new functional scoring method to prioritize functional autoimmune SNPs.  
120 We evaluated the performance of our functional scoring method by comparing it with  
121 other representative methods. We next explored potential molecular mechanisms  
122 underlying prioritized SNPs and analyzed the immunologically related function as  
123 well as potential clinical drug applications for predicted target genes. We also  
124 analyzed the roles of long-range chromatin interactions on autoimmune SNPs as well  
125 as potential key regulatory transcription factors (TFs). Finally, we developed an open  
126 web resource (<http://fnGWAS.online/>) and local analytical pipeline  
127 (<https://github.com/xjtugenetics/fnGWAS>).

128

129 **Results**

### 130 **Prioritizing potential noncoding functional autoimmune SNPs**

131 We collected 18,857 autoimmune noncoding tag SNPs predisposing to 19 distinct  
132 autoimmune diseases ( $P < 5 \times 10^{-8}$ ) from multiple resources (Table S1). LD analysis  
133 retained 51,594 noncoding tags and LD expanded ( $r^2 > 0.8$ ) SNPs in 333 genome-  
134 wide significant loci (autoimmune positive SNPs). We next collected 26,922,878  
135 background SNPs in all 333 loci, and collected 47,131,427 negative SNPs beyond  
136 these loci. To explore potential key epigenetic regulatory features for autoimmune  
137 diseases, we compared 606 epigenetic data annotation across 47 blood immune cell  
138 types between all autoimmune positive SNPs and background SNPs. Previous studies  
139 had suggested that the autoimmune causal SNPs are significantly enriched in blood-  
140 cell specific enhancer marks [18]. Consistently, we found that autoimmune positive  
141 SNPs are significantly higher enriched for 347 active epigenetic features ( $FC > 1$ ,  $P$   
142  $< 0.05/606$ ) across 40 blood immune cell types within four epigenetic categories,  
143 including 9 DHSs, 75 active histone modifications (H3K4me1, H3K4me2, H3K4me3,  
144 H3k27ac and H3K9ac), 167 active genomic segmentations (HMM-15, marked as  
145 active transcription or enhancer) and 96 TFBS (Figure 1a and Table S2). To evaluate  
146 the functionality of all positive SNPs, we devised a new epigenetic functional scoring  
147 approach (flowchart shown in Figure S1) using fold enrichment of all 347 significant  
148 epigenetic features across four epigenetic categories as weight. By comparing  
149 functional score of each positive SNPs with scoring distribution of negative SNPs,  
150 we prioritized 15,314 SNPs associated with 19 autoimmune diseases with  
151 functionality support on at least one epigenetic category (Figure 1b-c and Table S3).

152

### 153 **Integrative prediction of potential causal target genes on prioritized SNPs**

154 To explore potential regulatory targets for 15,314 prioritized SNPs, we integrated  
155 both cis-QTL association, 3D chromatin interaction and colocalization analysis from  
156 over 30 blood cell types (Table S4). We predicted 367 high-confident target genes  
157 regulated by 4,272 prioritized functional SNPs (Table S5 and S6), which had both  
158 cis-QTL, chromatin interaction and colocalization evidence ( $PP4 > 0.8$ ).

159

160 **Functional SNPs are significantly enriched in allele-specific motif and local**  
161 **molecular QTLs**

162 The functional SNPs might perturb allelic enhancer activities through mediating  
163 several intermediate molecular-level traits, such as bQTL [22], hQTL [23], dsQTL  
164 [24] or caQTL [25] (Figure 2a). To explore potential allelic regulatory mechanisms  
165 linking 4,272 prioritized autoimmune SNPs to predicted gene targets, we firstly  
166 performed motif analysis, and detected allele-specific binding motif on 2,603 SNPs  
167 (Figure 2a). We further analyzed multiple molecular QTL association (Table S7) for  
168 autoimmune SNPs, and identified 592 SNPs associated with several intermediate-  
169 level molecular traits (Table S8), including 143 bQTL SNPs preferentially binding to  
170 special allele on 5 TFs (JunD, NF- $\kappa$ B, PU.1, Pou2f1, Stat1) in LCLs, 303 caQTL or  
171 dsQTL SNPs affecting chromatin accessibility in either naive or stimulus-specific  
172 macrophages ( $n = 157$ ) or CD4+ T cells ( $n = 24$ ) or LCLs ( $n = 182$ ), as well as 230  
173 hQTL SNPs affecting chromatin modification on either H3K4me1 ( $n = 63$ ),  
174 H3K4me3 ( $n = 83$ ) or H3K27ac ( $n = 127$ ) in LCLs (Figure 2a). Further analysis  
175 revealed significant enrichment for all molecular QTL association (bQTL, dsQTL,  
176 caQTL and hQTL) on prioritized functional SNPs compared with all autoimmune  
177 SNPs ( $FC = 1.9 \sim 7.4$ ,  $P < 0.05$ , Figure 2b-e), implying their extensive regulatory  
178 roles. We also detected weak while significant enrichment for allele-specific binding  
179 motif on prioritized functional SNPs in comparison with all autoimmune SNPs ( $FC$   
180  $= 1.05$ ,  $P = 1.59 \times 10^{-14}$ , Figure not shown), further supporting their important  
181 regulatory roles. Together, these analyses suggested potential allelic regulatory  
182 mechanisms underlying 66.0% of prioritized autoimmune functional SNPs.

183

184 **Epigenetic functional scoring improves prioritizing functional autoimmune**  
185 **SNPs compared with other methods**

186 To further assess the performance of our epigenetic functional scoring, we compared  
187 the functional support on multiple immune-cell associated regulatory evidence  
188 between SNPs prioritized by our method and other five functional scoring methods  
189 [11-15]. Table S15 summarized the main characteristics between our method and

190 other scoring methods (see discussion for comparison in detail). To ensure fair  
191 comparison of methods performance, we extracted top-ranked SNPs under different  
192 functionality support by our method with corresponding equal or approximately  
193 equal counts of top-ranked SNPs from other methods, which resulted in comparison  
194 with two methods under all functionality support and another three methods under  
195 selected functionality supports (Figure 3a).

196

197 We firstly compared experimentally validated regulatory SNPs in mononuclear cells  
198 [26], and detected substantially more validated SNPs by our method compared with  
199 either FIRE, GWAS4D or IW-Scoring (Figure 3b). We also detected much more  
200 validated SNPs compared with 3DSNP under the first two functionality support and  
201 comparable validated SNPs compared with RegulomeDB (Figure 3b). Consistent  
202 results were found on experimentally validated regulatory SNPs in two no-immune  
203 cell types (K562, HepG2) [27], in which our method had substantially more validated  
204 SNPs compared with all four methods except for 3DSNP (Figure S2a-b). In  
205 comparison with 3DSNP, we identified comparable experimentally validated SNPs  
206 in two no-immune cell types (Figure S2a-b) while substantially more validated ones  
207 in the mononuclear cell (Figure 3b), implying the potential outperformance of our  
208 method in prioritizing immune cell specific regulatory SNPs. We next compared  
209 potential regulatory SNPs under multiple immune-related functional evidence  
210 (potential regulatory SNPs associated with gene expression, SNPs with molecular  
211 association, causal SNPs identified by PICS approach [18], eRNA SNPs from IBD  
212 patients [28]). We found that our prioritized SNPs was significantly higher enriched  
213 for nearly all functional evidence compared with all five methods (Fisher's exact test,  
214  $FC > 1, P < 0.05$ , Figure 3c-f). We also detected much higher percentage of molecular  
215 QTL SNPs or eRNA SNPs for our prioritized SNPs under the highest functionality  
216 support compared with either IW-Scoring ( $FC = 1.2, P = 0.08$ , Figure 3d) or 3DSNP  
217 ( $FC = 1.3, P = 0.06$ , Figure 3f) although not significant. Collectively, these analyses  
218 support the outperformance in prioritizing functional autoimmune SNPs by our  
219 epigenetic functional scoring method over other mentioned comparable methods.



220

## 221 **Target genes are significantly enriched in immunologically related functions**

222 To evaluate the immunologically related functions on predicted target genes on 4,272  
223 prioritized SNPs, we collected multiple immune-relevant functional datasets. We  
224 identified 181/367 highly-supported potential immunological genes (Figure 4a and  
225 Table S9), including 171 genes participated in immunologically related pathways, 25  
226 genes whose knockdown in mouse could display abnormal immune system  
227 phenotypes from IMPC portal [29], as well as 23 genes associated with Mendelian  
228 disorders with immunology-related clinical symptoms from the OMIM database. We  
229 further analyzed other suggestive immune-relevant functions for predicted target  
230 genes, and detected functional support for nearly all (365/367) target genes (Figure  
231 4a and Table S9), including 358 genes expressed on 20 blood immune cell types  
232 (RPKM > 1), 39 genes with tissue-specifically expression on blood as determined by  
233 TSEA approach ( $pSI < 0.01$ ) [30], 191 immune system diseases associated genes  
234 collected from the DisGeNET database [31], as well as 201 genes showed causal  
235 relationship with autoimmune diseases as implemented the SMR analysis ( $FDR <$   
236  $0.05$ ,  $P_{HEIDI} > 0.05$ , Table S10) [32]. Collectively, these data suggested potential  
237 immunological function for most gene targets, which may suggest new mechanistic  
238 insights into autoimmune disease etiologies.

239

240 To further verify the immunological roles for predicted target genes, we performed  
241 functional enrichment analysis. We found that the predicted target genes are  
242 significantly enriched in multiple immunologically related pathways (Figure 4b). We  
243 also detected significant enrichment for other immunologically related genes from  
244 different functional datasets (IMPC, OMIM, DisGeNET) and SMR causal genes and  
245 expressed genes on blood cell types on predicted target genes (Fisher's exact test, FC:  
246  $1.8 \sim 11.1$ ,  $P: 4.74 \times 10^{-6} \sim 6.96 \times 10^{-151}$ , Figure 4c). We further compared tissue-  
247 specific expression from TSEA [30] on 25 distinct cell types, and detected  
248 exclusively significant higher enrichment for blood tissue (Fisher's exact test, FC =  
249 1.4,  $P = 0.01$ , Figure 4d) on predicted target genes, which also showed the largest

250 number of tissue-specifically expressed genes (Figure 4d). Altogether, these analyses  
251 revealed extensive enrichment of immunologically related functions for target genes,  
252 supporting the credibility of our target gene prediction.

253

254 **Prevailing long-range regulation linking functional autoimmune SNPs to distal**  
255 **target genes**

256 Among 367 prioritized target genes, we detected larger amount of distal genes (n =  
257 333, regulated by distal functional SNPs) compared with local genes (n = 235,  
258 regulated by functional SNPs located within target gene promoter), including 132  
259 distal genes exclusively regulated by distal functional SNPs (Figure 5a). These  
260 exclusive distal genes included many known immunologic genes, such as *CD37*,  
261 *CD28*, *IL7*, *IL12RB1* or *IL2RA*, indicating the important roles of long-range  
262 regulation on autoimmune diseases. We further analyzed all 7,221 SNP-gene  
263 regulatory pairs, and detected predominantly distal pairs (87.87%) compared with  
264 local ones (Figure 5b). Interesting, the distal SNPs residing within local genes are  
265 more likely to regulate the distal target genes compared with their directly located  
266 genes (64.8% vs 17.89%, Figure 5b). We also analyzed the distance between all distal  
267 regulatory pairs, and found that the vast amount of distal SNP-gene regulatory pairs  
268 (66.5%) are located more than 50 kb away (mean distance: 105.4 kb, Figure 5c),  
269 further underscoring the important roles of chromatin looping on autoimmune  
270 diseases.

271

272 The prevailing long-range regulation may indicate that, for many functional  
273 noncoding autoimmune SNPs, their located or directly mapped genes might not be  
274 the direct regulatory target genes. Among 3,139 prioritized functional SNPs within  
275 gene region (intergenic SNPs excluded), we found that 67.1% of SNPs exclusively  
276 regulated 239 distal effect genes instead of directly located local genes. We show one  
277 such example in Figure 5d-f, in which multidimensional evidence (cis-QTLs, 3D  
278 chromatin interactions and colocalization) supported that multiple functional SNPs  
279 within *TNPO3* or in the intergenic region near *TNPO3* could regulate distal *IRF5*

280 expression through long-range chromatin interactions. The *IRF5* was also locally  
281 regulated by several functional SNPs within *IRF5* promoter region (Figure 5d-f). The  
282 immunological roles of *TNPO3* is largely unknown. In contrast, *IRF5* is a well-known  
283 immunological gene with crucial roles in autoimmune etiology [33], thus providing  
284 plausible mechanistic insights linking GWAS risk SNPs at *IRF5-TNPO3* locus to  
285 autoimmune pathogenesis [20].

286

### 287 **Distal autoimmune genetic regulatory network may be mediated by several key** 288 **TFs**

289 To identify potential functional TFs mediating genetic regulation for autoimmune  
290 diseases, we compared allele-specific motif occupying between 4,272 functional  
291 SNPs and all autoimmune SNPs. We identified 29/366 nominally significant  
292 (Fisher's exact test,  $P < 0.05$ ) motif TFs with higher enrichment for functional SNPs  
293 (Figure 5a and Table S11). To explore potential regulatory targets on prioritized TFs,  
294 we considered three possible TF-gene regulatory models (Figure 6b), including (1)  
295 local model: TFs directly bind to target gene promoter to mediate gene expression,  
296 (2) distal model: TFs bind to distal enhancers to regulate target gene expression via  
297 long-range chromatin interactions, and (3) indirect model: the TFs regulate target  
298 gene expression through mediating other regulatory TFs in trans manner. We found  
299 that most of our predicted target genes (72.8%, 267/367) could be regulated by these  
300 29 TFs (Figure 6b-c and Table S11), with predominant distal model ( $n = 218$ )  
301 compared with either local model ( $n = 102$ ) or indirect model ( $n = 112$ ). Moreover,  
302 CTCF had the most regulatory target genes (Table S11), consistent with its known  
303 role in facilitating long-range chromatin looping [34]. Further analysis revealed that  
304 all 29 TFs had more distal regulatory target genes compared with local genes (Figure  
305 6d), and 25 of them involved potential immunological functions (Figure 6e),  
306 implying their broad roles in distal genetic regulation on autoimmune diseases. We  
307 further analyzed the sharing of gene targets between different TFs, and detected 22  
308 TFs sharing all 267/267 target genes with all 7 other rest TFs (Figure 6f), indicating  
309 their potential central regulatory roles. Together, these analyses suggested several

310 possible key regulatory TFs mediating distal genetic regulatory networks on  
311 autoimmune diseases.

312

### 313 **Analyzing potential clinical applications on target genes**

314 To explore potential clinical implications on predicted target genes, we firstly  
315 investigated all approved or experimental drug targets with known indications. We  
316 identified 80 genes targeted by drugs with known clinical indications on either  
317 autoimmune diseases ( $n = 41$ ) or other immunologically related diseases (eg, allergies,  
318 infections or inflammations,  $n = 45$ ) or other diseases ( $n = 57$ ) (Figure 7a-b, Table  
319 S12), implying the extensive therapeutic implications on predicted target genes. The  
320 identified drug target genes showed pervasive shared drug indications, with 62.2 %  
321 of genes targeted for other immunologically related diseases and 42.1 % of genes  
322 targeted for other diseases also shared targeted indications for autoimmune diseases  
323 (Figure 7b and Table S12), indicating potential pleiotropic therapeutic-effect among  
324 drug targets. Except for known drug target genes, we also identified 190 potential  
325 druggable genes, including 118 ones without known drug target indications (Figure  
326 7a and Table S13). In comparison with all genome genes, our predicted target genes  
327 are significantly more enriched in both known drug target genes (Fisher's exact test,  
328  $FC = 4.3$ ,  $P = 2.93 \times 10^{-28}$ ) and predicted druggable genes (Fisher's exact test,  $FC =$   
329  $3.5$ ,  $P = 6.94 \times 10^{-61}$ ) (Figure 7c), further supporting the potential important clinical  
330 implications on them.

331

332 Consistent with the observed pleiotropic indications among drug target genes (Figure  
333 7b), we found extensive disease association sharing for both autoimmune drug target  
334 genes and other drug target or druggable genes (Figure S3a-b), which may suggest  
335 new potential opportunities for drug repurposing on autoimmune diseases from other  
336 non-autoimmune drug target or druggable genes. To explore the functional relevance  
337 between known autoimmune-drug genes and other genes, we firstly analyzed their  
338 shared biological pathways. We found that the vast majority (36/41) of autoimmune-  
339 drug genes shared the same immunologically related pathways with 68.9 % (131/190)

340 of drug target or druggable genes (Figure S3c), implying their intimately functional  
341 connectivity. We further performed protein-protein interaction (PPI) analysis, and  
342 detected strong PPI (interaction score  $> 0.9$ ) between 63.4 % (26/41) of autoimmune-  
343 drug genes and 31 other known drug target or druggable genes (Figure 7d), indicating  
344 the pervasive regulatory relevance between known autoimmune-drug target and other  
345 genes. This was further supported by enrichment analysis, in which 41 autoimmune-  
346 drug genes showed significantly higher PPI with either predicted druggable genes  
347 (FC = 2.0,  $P = 1.20 \times 10^{-71}$ ) or known drug target genes (FC = 3.1,  $P = 2.44 \times 10^{-108}$ )  
348 compared with whole genome genes (Fisher's exact test, Figure 7e). Besides, when  
349 restricted PPI targets of autoimmune-drug genes to our predicted gene targets, we  
350 found significantly higher PPI on our predicted target genes compared with either all  
351 predicted druggable genes (FC = 2.2,  $P = 9.40 \times 10^{-9}$ ) or all known drug target genes  
352 (FC = 2.1,  $P = 1.96 \times 10^{-6}$ ) (Fisher's exact test, Figure 7e). Based on these analyses  
353 above, it is reasonable to assume that incorporating both GWAS genetic regulation  
354 and protein interaction network could help prioritize new potential drug target genes  
355 for autoimmune diseases. We prioritized 25 new candidate drug target genes for seven  
356 autoimmune diseases (Figure 7f-h and S5, Table S14), which showed both strong PPI  
357 with known drug target genes and genetic regulation associated with the same  
358 autoimmune disease. Among 25 prioritized genes, we found 14 genes with known  
359 indications on other autoimmune diseases as well as 2 genes (*NFKB1*, *SH2B3*) with  
360 indications on other diseases (Figure 7f-h and S4). The rest 9 genes had no indications  
361 while with druggable evidence, including 4 genes (*DAG1*, *IL27*, *STX4*, *SH2B1*)  
362 predicted targeted for ulcerative colitis and 3 genes (*IL27*, *IFNLRI*, *PPP5C*)  
363 predicted targeted for ankylosing spondylitis as well as 6 genes (*IFNLRI*, *SOC31*,  
364 *IL27*, *STAT2*, *IL18RI*, *SH2B1*) predicted targeted for psoriasis (Figure 7f-h). Together,  
365 our analysis not only prioritized some new promising drug targets for future drug  
366 exploration, but also suggested some known drug targets (*NFKB1*, *SH2B3*) that could  
367 be exploited for future drug repurposing on autoimmune diseases.

368

369 **Open web application and local pipeline**

370 To facilitate quick search for interested SNP(s) or gene(s) prioritized by our  
371 integrative analysis, we developed an open website (<http://fngwas.online/>) collecting  
372 comprehensive resources including functional scores on all noncoding autoimmune  
373 SNPs, regulatory target genes on prioritized functional SNPs, immunologically  
374 related functions for predicted target genes, clinical drug applications for target genes  
375 as well as regulatory mechanisms underlying functional SNPs. We also provided  
376 precomputed functional analysis results across whole genome SNPs/genes for bulk  
377 downloading (<http://fngwas.online/download.php>), which included functional scores  
378 and predicted allelic regulatory mechanisms underlying all autosomal noncoding  
379 SNPs as well as multiple disease-relevant function and drug target analysis for all  
380 genome genes. To further expand the potential application of our analytical frame on  
381 other complex diseases/traits, we also developed packaged local pipeline named  
382 fnGWAS (dissecting the functionality of noncoding GWAS SNPs, workflow shown  
383 in Figure S5), which could be run on any local Linux server with user-definable  
384 annotation data and parameters (<https://github.com/xjtugenetics/fnGWAS>).

385

## 386 **Discussion**

387 The majority of autoimmune susceptibility SNPs are located in the noncoding region.  
388 It remains challenging to pinpoint the causal SNPs and functional genes to decipher  
389 the underlying biological mechanisms. In this study, we systematically evaluated the  
390 molecular mechanisms underlying noncoding susceptibility SNPs associated with 19  
391 autoimmune diseases, through combining functional SNPs prioritizing, target gene  
392 prediction, allelic regulatory mechanisms analysis, gene function annotation as well  
393 as drug application exploration. We found predominant long-range chromatin  
394 interaction linking functional SNPs to distal target genes, which may be mediated by  
395 several key TFs including CTCF. Particularly, we detected extensive regulatory roles  
396 underlying prioritized functional SNPs, as well as broad immunological functions  
397 and clinical drug applications on predicted target genes. We also developed open  
398 website and analytical pipeline. We hope that our systematic analyses may be helpful

399 for future experimental follow-up as well as clinical exploitation of drug repurposing  
400 on autoimmune diseases.

401

402 We have previously integrated epigenetic features for known disease-associated  
403 SNPs to predict novel susceptibility loci for complex diseases [35-38]. In this study,  
404 we developed a new improved epigenetic functional scoring method to prioritize  
405 functional autoimmune SNPs through incorporating hundreds of immune cell-  
406 specific active epigenetic information. Some other comparable scoring methods are  
407 also developed, such as 3DSNP [13], FIRE [11], GWAS4D [14], IW-Scoring [15] or  
408 RegulomeDB [12]. Compared with these approaches, one distinct feature of our  
409 method was the integrating of immune cell-specific epigenetic information (Table  
410 S15), which might provide better evaluation for disease-specific functional  
411 autoimmune SNPs. Another feature of our analysis frame is the comprehensive  
412 functional evaluation on multiple regulatory levels spanning SNP functional scoring,  
413 gene target prediction, gene function analysis and gene clinical application analysis,  
414 as well as SNP regulatory mechanisms analysis (Table S15). Indeed, the integration  
415 of cell-specific epigenetic annotation has been proved highly successful for  
416 prioritizing functional GWAS SNPs validated by experimental assays in many recent  
417 studies [39, 40]. Our analysis revealed that the top-ranked autoimmune SNPs  
418 prioritized by our method are significantly higher enriched in multiple blood immune  
419 cell associated regulatory elements compared with other methods, implying the  
420 outperformance of our method. We anticipated that future incorporation of more other  
421 cell-specific or context-specific epigenetic information could help identify functional  
422 SNPs associated with other complex diseases/traits.

423

424 Recent studies have shown that considerable noncoding GWAS SNPs could regulate  
425 target genes through long-range loop formation [41-43], providing unprecedented  
426 new mechanical insights underlying GWAS disease association. Consistently, our  
427 analysis revealed prevailing long-range regulation linking functional autoimmune  
428 SNPs to distal target genes, suggesting the important roles of chromatin interactions

429 for autoimmune diseases. Our analysis also suggested that many functional SNPs  
430 within local gene could regulate distal target gene expression, including vast amounts  
431 of functional SNPs within local gene promoter. One underlying mechanism  
432 hypothesis was that gene promoter could also act as enhancer which was termed  
433 Epromoter to regulate distal gene expression [44], which was consistent with our  
434 recent findings that one functional autoimmune risk SNP within *TNPO3* promoter  
435 could independently regulate distal *IRF5* expression via long-range loop formation  
436 [20]. We also identified several potential key regulatory TFs with significant  
437 enrichment in functional autoimmune SNPs, including CTCF. CTCF is well-known  
438 for its regulatory roles for mediating enhancer-promoter interaction in chromatin loop  
439 formation [34], and played essential roles in late B-cell differentiation [45]. In line  
440 with the prevailing long-range genetic regulation detected for autoimmune diseases,  
441 we found predominant distal regulatory genes compared with local ones for all  
442 enriched TFs, indicating their potential roles in mediating distal genetic regulatory  
443 network for autoimmune diseases. Future functional assays are needed to decipher  
444 their precise regulatory mechanisms.

445

446 The past fruitful GWAS findings have remarkably accelerated the translation of new  
447 drug clinical utilities [4]. The drug targets with human genetic evidence of disease  
448 association are twice as likely to lead to approved drugs [46]. Consistently, we found  
449 that our predicted autoimmune target genes are significantly more enriched in both  
450 known drug target genes and druggable genes compared with whole genome genes,  
451 supporting the potential important clinical implications on disease effector genes. A  
452 previous GWAS study has incorporated PPI with 98 annotated RA risk genes to  
453 predict new drug targets, and highlighted *CDK6* and *CDK4* as promising candidates  
454 [47]. The incorporation of functional genomic and immune-related annotations as  
455 well as PPI has been demonstrated successfully in prioritizing potential drug target  
456 on immune-related traits [48]. Consistently, our study integrated both genetic  
457 association and PPI, and prioritized 25 candidate drug target genes on 7 autoimmune  
458 diseases, including many genes (16/25) with known indications on autoimmune



459 diseases or other diseases. The drug repurposing strategies have shed light on many  
460 new promising therapeutic opportunities for autoimmune diseases, such as the  
461 dopaminergic drug for multiple sclerosis [49] or Fibrate for treating for primary  
462 biliary cirrhosis [50]. Our results may provide important clues for future clinical drug  
463 repurposing on autoimmune diseases. For example, we predicted *IL2RA* to be a  
464 potential new drug target for ankylosing spondylitis. *IL2RA* is targeted by several  
465 known drugs (eg. HuMax-TAC) with indications on autoimmune diabetes and has  
466 known roles in the pathogenesis of autoimmunity [5]. Besides, we found that *IL2RA*  
467 was regulated by several functional SNPs associated with ankylosing spondylitis.  
468 Collectively, these evidence suggest the potential drug repurposing opportunity of  
469 *IL2RA* on ankylosing spondylitis.

470

471 In conclusion, we performed comprehensive functional genetic analysis for 19  
472 autoimmune diseases. We hope that our unique resource may help accelerate the  
473 translation from GWASs findings into biologically and clinically useful insights  
474 underlying autoimmune diseases pathogenies.

475

## 476 **Materials and Methods**

### 477 **Autoimmune SNPs collection**

478 We collected SNPs associated with 19 autoimmune diseases [alopecia areata (AA),  
479 ankylosing spondylitis (AS), autoimmune thyroid disease (ATD), celiac disease  
480 (CEL), Crohn's disease (CRO), IgE and allergic sensitization (IGE), inflammatory  
481 bowel disease (IBD), juvenile idiopathic arthritis (JIA), multiple sclerosis (MS),  
482 narcolepsy (NAR), primary biliary cirrhosis (PBC), primary sclerosing cholangitis  
483 (PSC), psoriasis (PSO), rheumatoid arthritis (RA), systemic lupus erythematosus  
484 (SLE), systemic scleroderma (SSc), type1 diabetes (T1D), ulcerative colitis (UC),  
485 and vitiligo (VIT)] from multiple resources, including the GWAS Catalog [3], the  
486 ImmunoBase (<https://www.immunobase.org/>) and other public studies [51, 52]. All  
487 databases were visited in March 2019 and summarized in Table S1. For SNPs  
488 achieved genome-wide significance reported in European ancestry ( $P < 5 \times 10^{-8}$ ), any

489 coding or splicing SNPs annotated by ANNOVAR [53] using GENCODE v19  
490 reference data were removed. We further excluded SNPs within the major  
491 histocompatibility complex locus (MHC,  
492 <https://www.ncbi.nlm.nih.gov/grc/human/regions/MHC?asm=GRCh37.p13>) due to  
493 the complex LD patterns. The filtered SNPs were selected as autoimmune tag SNPs.

494

#### 495 **LD analysis, positive, background and negative SNPs definition**

496 LD analysis for autoimmune tag SNPs was conducted using PLINK v1.90 [54] in  
497 European samples from 1000 genome v3 genotype data [55], with maximum distance  
498 for  $r^2$  calculation set as 1M. Genome-wide significant loci were defined as merged  
499 unique regions surrounding 1M of any filtered noncoding tag SNPs with overlapping  
500 MHC region truncated. We extracted noncoding tags and LD expanded ( $r^2 > 0.8$ )  
501 SNPs within genome-wide significant loci as positive SNPs and all noncoding SNPs  
502 in these loci as background SNPs. We collected 41,377 susceptible SNPs with ID  
503 record in the 1000 genome v3 genotype data [55] from GWAS Catalog (visited in  
504 March 2019). All other noncoding SNPs beyond genome-wide significant loci and  
505 beyond MHC region with low LD ( $r^2 < 0.1$ ) with the GWAS catalog susceptible SNPs  
506 were selected as negative SNPs.

507

#### 508 **Epigenetic functional scoring**

509 *Epigenetic features selection.* We collected 606 epigenetic data (called peak region)  
510 on 47 blood cell types from Roadmap [56] and ENCODE Project [57]. Four different  
511 epigenetic categories of data were incorporated for SNP annotation, including 15  
512 chromatin states (HMM-15), histone modification, DNase I hypersensitive sites  
513 (DHS) and transcription factor binding sites (TFBS). One epigenetic feature  
514 represents one epigenetic annotation in one cell type (eg, H3K4me1 in GM12878).  
515 SNPs were labeled as annotated or unannotated on each epigenetic feature by  
516 analyzing their overlapping with selected feature using bedtools v2.25.0 [58]. We  
517 performed enrichment analysis for each epigenetic feature by comparing counts of  
518 annotated positive SNPs and background SNPs using chi-square test. All epigenetic

519 features with significantly higher enrichment for positive SNPs compared with  
520 background SNPs (Fold enrichment > 1, Bonferroni adjusted  $P < 0.05$ ) were selected  
521 for the following epigenetic scoring. The fold enrichment (FC) is defined as:

$$522 \quad FC = \frac{\text{annotated positive SNPs} \times \text{total background SNPs}}{\text{annotated background SNPs} \times \text{total positive SNPs}}$$

523

524 **Functional scoring.** Based on our previous epigenetic enrichment approach [37, 38],  
525 we developed a new cell-specific epigenetic weighted scoring method to evaluate the  
526 functionality for all noncoding autoimmune positive SNPs (flowchart shown in  
527 Figure S1). For each epigenetic category (HMM-15, histone modification, DHS,  
528 TFBS), we adopted an accumulative quantitative score system using fold enrichment  
529 of selected significant features within each category as weight, separately, which is  
530 defined as follows:

$$531 \quad \text{Score} = \sum_{j=1}^n FC_j B$$

532 Where  $j$  denotes particular feature ( $1 \leq j \leq n$ ) among each epigenetic category  
533 (assuming  $n$  total features),  $B$  indicates whether the tested positive SNP was  
534 annotated ( $B = 1$ ) or unannotated ( $B = 0$ ) on feature  $j$ . Therefore, we can get four  
535 independent functional scores across four different epigenetic categories for each  
536 tested SNP. For each epigenetic category, we further scored for all negative SNPs to  
537 build null distribution, and prioritized any positive SNPs with score higher than the  
538 top 5% ranked score value of all negative SNPs as potential functional. Finally, any  
539 positive SNPs with functionality support in at least one epigenetic category were  
540 determined as potential functional.

541

#### 542 **Predicting target genes for prioritized functional SNPs**

543 **Cis-QTL analysis.** We examined the cis-quantitative trait loci (cis-QTLs) association  
544 between prioritized noncoding SNPs and all nearby genes in 1M region. We collected  
545 12 cis-eQTL and 2 cis-pQTL data over 20 blood immune cell types from 13 different  
546 published studies (Table S4). For pQTL data from the INTERVAL study [59], we  
547 extracted all cis-pQTL (1M surrounding gene TSS) pairs and transformed the protein

548 ID to gene symbol ID using the UniProt online tools. For any full QTL dataset  
549 without multiple testing corrections, we adjusted original  $P$  using false discovery rate  
550 (FDR) method. All significant QTL results with probe/gene level FDR < 5%  
551 validated by at least two different datasets were retained.

552

553 ***Three-dimensional (3D) chromatin interaction analysis.*** All SNP-gene pairs with  
554 cis-QTL associations were divided into either local (SNPs within target gene  
555 promoter (1KB surrounding TSS)) or distal (SNPs beyond target gene promoter). We  
556 collected chromatin interaction assay (5C, in situ Hi-C, capture Hi-C, HiChIP, ChIA-  
557 PET) and predicted chromatin interaction data (IM-PET, PreSTIGE, PHM) on  
558 multiple blood immune cell types from 11 different studies (Table S4). To validate  
559 the long-range regulation between distal SNP-gene pairs, the 3D chromatin  
560 interactions between prioritized SNP and gene transcript promoter region  
561 (GENCODE v19) were examined using bedtools v2.25.0 [58]. The integration of cis-  
562 QTLs and 3D chromatin interactions might better identify causal regulatory effect at  
563 GWAS loci by diminishing the potential accidental overlapping with QTLs for  
564 GWAS SNPs [60]. All distal SNP-gene pairs with chromatin interaction evidence  
565 from at least two different datasets were retained.

566

567 ***Co-localization analysis.*** To validate the potential causal genetic regulatory effect for  
568 filtered local or distal target genes, we employed two complementary methods [61,  
569 62] to assess whether the detected GWAS signal and cis-QTL association shared the  
570 same causal variant. For 16 GWAS summary and 7 full QTL datasets available (Table  
571 S1 and S4), we employed the Coloc [61] method using coloc R package for Co-  
572 localization analysis. The Coloc method [61] adopted a Bayesian statistical test using  
573 summary-level data to estimate five posterior probabilities: no association with either  
574 GWAS or QTL (PP0), association with GWAS while not with QTL (PP1), association  
575 with QTL while not with GWAS (PP2), association with GWAS and QTL while with  
576 two independent SNPs (PP3), association with both GWAS and QTL with one shared  
577 causal SNP (PP4). We defined 100-KB region surrounding each GWAS index SNP

578 ( $P < 5 \times 10^{-8}$ ) and tested for co-localization with any overlapping QTL genes. For all  
579 curated GWAS and QTL datasets (including datasets with no full summary-level data  
580 available, Table S1 and S4), we also employed another adapted Coloc method named  
581 PICCOLO [62] for Co-localization analysis. The PICCOLO [62] estimates the  
582 colocalization of GWAS and QTL PICS (Probabilistic Identification of Causal SNPs)  
583 [18] credible set using reported lead SNPs and  $P$ -value. The PICS was a fine-mapping  
584 algorithm to estimate each SNP's probability of being causal at a given locus [18].  
585 We performed PICCOLO analysis as described using piccolo R package by  
586 Tachmazidou et al. [63]. Briefly, we firstly estimated the PICS credible set for each  
587 lead GWAS index SNP and each top QTL SNP using pics.download and then  
588 performed colocalization analysis using pics.coloc.lite with default parameter. For  
589 both Coloc and PICCOLO, any genes with both PP4 greater than 80% and significant  
590 QTL association with prioritized SNPs from at least two cis-QTL datasets were  
591 considered to support the co-localization.

592

593 ***Local and distal target gene prediction.*** We predicted local or distal target gene on  
594 prioritized SNPs using different strategies. For local ones, any genes with both cis-  
595 QTLs association and colocalization evidence were prioritized to be potential target  
596 genes. For distal ones, any genes with multidimensional evidence including cis-QTLs  
597 association, 3D chromatin interaction and colocalization were considered to be  
598 potential target genes.

599

## 600 **Deciphering allelic regulatory mechanisms underlying prioritized SNPs**

601 ***Allele-specific motif analysis.*** We analyzed the allelic effect of prioritized functional  
602 SNPs on transcription factor binding motifs using FIMO from MEME Suite toolkit  
603 (v4.11.0) [64] with default parameters and TF motifs available from 5 public motif  
604 databases, including JASPAR (2018 version) [65], HOCOMOCO (v11) [66],  
605 SwissRegulon [67], Transfac and Jolma2013 [68]. To identify potential functional  
606 motifs, we focused motif search on TF genes with high expression in at least one of  
607 the 20 blood immune cells from Roadmap [56] or DICE [69] (RPKM >1). The allele-

608 specific binding motifs predicted by at least two different datasets were retained.

609

610 ***Molecular QTL analysis.*** We collected different molecular QTL data in multiple  
611 blood cell types from 8 studies (Table S7), including transcription factor binding  
612 quantitative trait loci (bQTL) on five immune-relevant TFs (NF- $\kappa$ B, PU.1, Stat1,  
613 JunD, and Pou2f1), histone modification quantitative trait loci (hQTL)  
614 (H3K4me1/H3K4me3/H3K27ac), DNase-I hypersensitivity quantitative trait loci  
615 (dsQTL) and chromatin accessibility quantitative trait loci (caQTL). For all QTL  
616 datasets, the tested SNP and molecular peak (TF binding sites or ChIP-Seq peaks)  
617 pairs could be divided into either local (SNP located within molecular peak) or distal  
618 ones (SNP located beyond molecular peak). We retained significant association  
619 results between prioritized functional SNPs and local molecular peaks which passed  
620 multiple testing corrections (FDR < 0.1).

621

## 622 **Comparison with other functional scoring methods**

623 ***Curation of top-ranked SNPs.*** We compared our epigenetic functional scoring with  
624 five other functional scoring methods, including 3DSNP [13], FIRE [11], GWAS4D  
625 [14], IW-Scoring [15] and RegulomeDB [12]. The IW-Scoring [15] integrated eleven  
626 commonly used scoring methods to assign SNP a combined significance level ( $P$ -  
627 value) and outperformed any single method. We therefore did not compare our  
628 method with these eleven methods. Functional scores of all autoimmune positive  
629 SNPs from these methods were collected from online database in March 2019. We  
630 extracted prioritized autoimmune SNPs by our method under four different minimum  
631 functionality evidence ( $\geq 4$ ,  $\geq 3$ ,  $\geq 2$ ,  $\geq 1$ ,  $n = 1,791 \sim 15,331$ ), and extracted  
632 equivalent or approximately equivalent top-ranked SNPs by other five methods for  
633 functional comparison. (1) Since both 3DSNP and FIRE adopted the quantitative  
634 scoring system, we selected those top scoring ranked SNPs equal to our prioritized  
635 SNPs under different minimum evidence ( $\geq 4$ ,  $\geq 3$ ,  $\geq 2$ ,  $\geq 1$ ) for functional  
636 comparison, respectively. (2) The GWAS4D calculated combined regulatory  
637 probability ( $P$ -value) for examined variants by jointly considering cell type-specific

638 regulatory potential and cell type-free composite score. We retained significant SNPs  
639 on GM12878 ( $P < 0.05$ ,  $n = 16,868$ ) for comparison with our prioritized SNPs under  
640 at least one functional evidence ( $\geq 1$ ,  $n = 15,314$ ), which had approximately equal  
641 SNP counts. (3) Similarly, we selected significant SNPs ( $P < 0.05$ ,  $n = 341$ ) by IW-  
642 scoring for functional comparison with our prioritized SNPs under at least four  
643 evidence ( $\geq 4$ ,  $n = 1,791$ ), which had the closest SNP counts. (4) The RegulomeDB  
644 adopted a category based scoring system (class from 1-7, with lower rank means  
645 higher functional support). We extracted SNPs ranked within class 1 ( $n = 1,958$ ) or  
646 within class 1-2 ( $n = 3,575$ ) for functional comparison with our prioritized SNPs  
647 under at least three ( $\geq 3$ ,  $n = 3,973$ ) or four evidence ( $\geq 4$ ,  $n = 1,791$ ), respectively,  
648 which had the closest SNP counts.

649

650 ***Functional enrichment comparison.*** For collected functional SNPs set from each  
651 methods, we firstly compared their experimentally validated SNPs count in three cell  
652 types (blood mononuclear cells, K562 and HepG2) from two recent high-throughput  
653 screen reports [26, 27]. We next compared their functionality enrichment on multiple  
654 regulatory data support using Fisher's exact test, including (1) SNPs with predicted  
655 local or distal target genes by integrating cis-QTL and chromatin interaction analysis  
656 on over 30 blood immune cell types (Table S4), (2) SNPs annotated with molecular  
657 QTL (bQTL, hQTL, dsQTL and caQTL) on multiple blood immune cell types (Table  
658 S7), (3) reported causal SNPs associated with 16 autoimmune diseases (AA, AS, ATD,  
659 CEL, CRO, JIA, MS, PBC, PSC, PSO, RA, SLE, SSC, T1D, UC, VIT) prioritized by  
660 the PICS approach [18], and (4) SNPs annotated with enhancer RNA (eRNA) from  
661 IBD patient samples [28].

662

663 **Exploring immunologically related functions for predicted target genes**

664 ***Pathway analysis and functional genes curation.*** We performed biological pathway  
665 enrichment analysis (including Gene Ontology [GO], Kyoto Encyclopedia of Genes  
666 and Genomes [KEGG], Disease Ontology [DO] and Reactome pathway) for all  
667 predicted gene targets using clusterProfiler R package with default parameter [70],

668 except that setting `use_internal_data = TURE` for KEGG enrichment analysis to  
669 enable online query from latest KEGG data. To identify potential immunologically  
670 related genes, we manually curated immunologically related biological pathways  
671 from all annotated terms on predicted target genes. We also collected  
672 immunologically related genes from other public datasets, including the International  
673 Mouse Phenotyping Consortium (IMPC) portal (<http://www.mousephenotype.org/>,  
674 release-9.2), the Online Mendelian Inheritance in Man (OMIM) database  
675 (<https://www.omim.org/>), and the DisGeNET database  
676 (<http://www.disgenet.org/home/>, v6.0, expert curated or text mining predicted genes)  
677 [31]. All dataset were downloaded or queried online in May 2019.

678

679 ***Gene expression and tissue-specific expression analysis.*** We collected gene  
680 expression data on 5 blood immune cell types (CD4 memory, CD4 naïve, Mobilized  
681 CD34, Peripheral blood mononuclear, GM12878) from Roadmap [56] and 15  
682 primary immune cells types from the DICE project (<http://dice-database.org/>) [69].  
683 Gene expression was measured by RPKM (reads per kilobase per million mapped  
684 reads). We collected the gene lists with tissue-specific expression (as based on a  
685 specificity index threshold [pSI],  $pSI < 0.01$ ) in 25 broad GTEx tissue types from  
686 report by Wells et al. [30].

687

688 ***SMR analysis.*** We analyzed the causal relationship between predicted target genes  
689 and autoimmune diseases risk using 16 GWAS summary and 7 QTL summary data  
690 (Table S1 and S4) by the summary data–based Mendelian randomization (SMR)  
691 approach [32]. We ran SMR (v0.712) with default parameters. LD correlations  
692 between SNPs were estimated from 6,743 unrelated European samples from the  
693 Atherosclerosis Risk in Communities (ARIC) data (dbGap: phs000280.v3.p1.c1) [71]  
694 with one of each pair of individuals with a SNP-derived relatedness estimate of  $>$   
695 0.025 suggested by GCTA (v1.91) [72] randomly removed. Gene-disease pairs  
696 passed both multi-SNP-based SMR test (FDR adjusted  $P_{SMR} < 0.05$ ) and  
697 heterogeneity test by HEIDI ( $P_{HEIDI} > 0.05$ ) were considered to be potential causal.



698

### 699 **Regulatory TF analysis**

700 We performed enrichment analysis for all allele-specific binding TFs on functional  
701 autoimmune SNPs by comparing annotated functional SNPs with all positive  
702 autoimmune SNPs using Fisher's exact test. For each TF with significant higher  
703 enrichment on autoimmune SNPs ( $P < 0.05$ ,  $FC > 1$ ), we assigned the predicted  
704 regulatory targets of its binding SNPs as its direct regulatory target genes. The TF-  
705 gene regulatory network was visualized by Cytoscape V3.4  
706 (<http://www.cytoscape.org/>).

707

### 708 **Drug target and drug repurposing analysis**

709 *Curation of drug target genes.* Clinically approved or experimental drug target genes  
710 with known indications were obtained from 3 different databases, including the  
711 DrugBank database (<https://www.drugbank.ca/>, v5.1.2) [73], the Therapeutic target  
712 database (TTD, 2018 updated) [74] and Open Targets database [75]. All three drug  
713 databases were queried in March 2019. For TTD dataset, we translated the UniProt  
714 protein ID into corresponding gene symbol ID using UniProt online tools. All drug  
715 indications were manually classified into autoimmune diseases, immunologically  
716 related diseases (allergies, infections, inflammations, rejection, immune system  
717 diseases and hematologic malignancies) or other diseases.

718

719 *Curation of druggable genes.* We collected potentially druggable genes from either  
720 DGIdb ([www.dgldb.org](http://www.dgldb.org), v3.0.2) [76], Pharos (<https://pharos.nih.gov/idg/targets>) [77]  
721 or report by Finan et al. [78]. We queried DGIdb and Pharos in March 2019. The  
722 DGIdb organized druggable genome under two classes, including over 35 validated  
723 or predicted drug-gene interaction types from 20 disparate sources, and 39 gene  
724 categories associated with druggability. The Pharos classified all targets into 4 groups  
725 by characterizing the degree to which they are not studied (labeled Tdark) or studied  
726 (labeled Tbio, Tchem or Tclin). The studied targets from Pharos were retained. Any  
727 gene targets with druggability evidence from at least two resources were prioritized

728 as potentially druggable.

729

730 ***Predicting new potential drug target genes.*** For all annotated drug target or  
731 druggable genes, we analyzed protein-protein interaction (PPI) between these genes  
732 and all other genes. PPI was queried online from the STRING database ([https://string-  
733 db.org/](https://string-db.org/)) in June 2019 with only high-confident interacted pairs (interaction score >  
734 0.9) retained. By leveraging both PPI and upstream autoimmune diseases regulatory  
735 information, we can prioritize new potential drug target gene A or for particular  
736 disease B by filtering: (1) A has strong PPI (interaction score > 0.9) with any drug  
737 target gene C which had known indication on autoimmune disease B, (2) Both A and  
738 C are regulated by upstream functional SNPs predisposing to autoimmune disease B,  
739 (3) A is either known drug target gene or predicted druggable gene. The predicted  
740 genes with known indication on other disease might suggest new potential drug  
741 repurposing opportunities.

742

### 743 **Functional enrichment analysis**

744 Functional enrichment for all collected immune-relevant functional datasets (IMPC,  
745 OMIM, SMR, DisGeNET, TSEA, gene expression, drug target) on predicted target  
746 genes was analyzed by comparing annotated target genes with whole genome genes  
747 in each dataset using Fisher's exact test. Functional enrichment for immune-cell  
748 associated regulatory data (motif, molecular QTL) on prioritized functional SNPs  
749 was analyzed by comparing annotated functional SNPs with all positive autoimmune  
750 SNPs using Fisher's exact test.

751

### 752 **Data availability**

753 All analysis results are free for searching online or bulk downloading at  
754 <http://fngwas.online>.

755 Analysis pipeline scripts are available at <https://github.com/xjtugenetics/fnGWAS>.

756

757 **Description of Supplemental Data**

758 Supplemental Data contains 5 supplementary figures and 15 supplementary tables.

759

760 **Acknowledgments**

761 We thank the ARIC Communities study. We obtained ARIC data through dbGaP  
762 authorized access at <https://dbgap.ncbi.nlm.nih.gov/aa/wga.cgi?page=login> with the  
763 accession number of data phs000280.v3.p1.c1. We are grateful to Dr. Ruihua Jing for  
764 the constructive discussions of manuscript preparation.

765

766 **Funding support**

767 This work was supported by the National Natural Science Foundation of China  
768 (31871264, 81573241); China Postdoctoral Science Foundation (2018T111038); the  
769 Innovative Talent Promotion Plan of Shaanxi Province for Young Sci-Tech New Star  
770 (2018KJXX-010); Zhejiang Provincial Natural Science Foundation of China  
771 (LGF18C060002); and the Fundamental Research Funds for the Central Universities.

772 The funders had no role in study design, data collection and analysis, decision to publish,  
773 or preparation of the manuscript.

774

775 **Competing interests**

776 The authors disclose no conflicts.

777

## 778 **References**

- 779 1. Hayter SM, Cook MC. Updated assessment of the prevalence, spectrum and case definition of  
780 autoimmune disease. *Autoimmunity reviews*. 2012;11(10):754-65.
- 781 2. Selmi C, Lu Q, Humble MC. Heritability versus the role of the environment in autoimmunity. *Journal*  
782 *of autoimmunity*. 2012;39(4):249-52.
- 783 3. MacArthur J, Bowler E, Cerezo M, Gil L, Hall P, Hastings E, et al. The new NHGRI-EBI Catalog of  
784 published genome-wide association studies (GWAS Catalog). *Nucleic acids research*. 2017;45(D1):D896-  
785 d901.
- 786 4. Visscher PM, Wray NR, Zhang Q, Sklar P, McCarthy MI, Brown MA, et al. 10 Years of GWAS  
787 Discovery: Biology, Function, and Translation. *The American Journal of Human Genetics*. 2017;101(1):5-  
788 22.
- 789 5. Theofilopoulos AN, Kono DH, Baccala R. The multiple pathways to autoimmunity. *Nature*  
790 *Immunology*. 2017;18:716.
- 791 6. Kircher M, Witten DM, Jain P, O'Roak BJ, Cooper GM, Shendure J. A general framework for  
792 estimating the relative pathogenicity of human genetic variants. *Nat Genet*. 2014;46(3):310-5.
- 793 7. Zhou J, Troyanskaya OG. Predicting effects of noncoding variants with deep learning-based  
794 sequence model. *Nat Methods*. 2015;12(10):931-4.
- 795 8. Ritchie GR, Dunham I, Zeggini E, Flicek P. Functional annotation of noncoding sequence variants.  
796 *Nat Methods*. 2014;11(3):294-6.
- 797 9. Shihab HA, Rogers MF, Gough J, Mort M, Cooper DN, Day IN, et al. An integrative approach to  
798 predicting the functional effects of non-coding and coding sequence variation. *Bioinformatics*.  
799 2015;31(10):1536-43.
- 800 10. Smedley D, Schubach M, Jacobsen JOB, Kohler S, Zemojtel T, Spielmann M, et al. A Whole-Genome  
801 Analysis Framework for Effective Identification of Pathogenic Regulatory Variants in Mendelian Disease.  
802 *American journal of human genetics*. 2016;99(3):595-606.
- 803 11. Ioannidis NM, Davis JR, DeGorter MK, Larson NB, McDonnell SK, French AJ, et al. FIRE: functional  
804 inference of genetic variants that regulate gene expression. *Bioinformatics*. 2017;33(24):3895-901.
- 805 12. Boyle AP, Hong EL, Hariharan M, Cheng Y, Schaub MA, Kasowski M, et al. Annotation of functional  
806 variation in personal genomes using RegulomeDB. *Genome Res*. 2012;22(9):1790-7.
- 807 13. Lu Y, Quan C, Chen H, Bo X, Zhang C. 3DSNP: a database for linking human noncoding SNPs to their  
808 three-dimensional interacting genes. *Nucleic acids research*. 2017;45(D1):D643-D9.
- 809 14. Huang D, Yi X, Zhang S, Zheng Z, Wang P, Xuan C, et al. GWAS4D: multidimensional analysis of  
810 context-specific regulatory variant for human complex diseases and traits. *Nucleic acids research*.  
811 2018;46(W1):W114-W20.
- 812 15. Wang J, Dayem Ullah AZ, Chelala C. IW-Scoring: an Integrative Weighted Scoring framework for  
813 annotating and prioritizing genetic variations in the noncoding genome. *Nucleic acids research*.  
814 2018;46(8):e47.
- 815 16. Ionita-Laza I, McCallum K, Xu B, Buxbaum JD. A spectral approach integrating functional genomic  
816 annotations for coding and noncoding variants. *Nat Genet*. 2016;48(2):214-20.
- 817 17. Fu Y, Liu Z, Lou S, Bedford J, Mu XJ, Yip KY, et al. FunSeq2: a framework for prioritizing noncoding  
818 regulatory variants in cancer. *Genome Biol*. 2014;15(10):480.
- 819 18. Farh KK, Marson A, Zhu J, Kleinewietfeld M, Housley WJ, Beik S, et al. Genetic and epigenetic fine  
820 mapping of causal autoimmune disease variants. *Nature*. 2015;518(7539):337-43.
- 821 19. Gallagher MD, Chen-Plotkin AS. The Post-GWAS Era: From Association to Function. *American*  
822 *journal of human genetics*. 2018;102(5):717-30.
- 823 20. Thynn HN, Chen XF, Hu WX, Duan YY, Zhu DL, Chen H, et al. An allele-specific functional SNP  
824 associated with two systemic autoimmune diseases modulates IRF5 expression by long-range chromatin  
825 loop formation. *J Invest Dermatol*. 2019:533661.
- 826 21. Inshaw JRJ, Cutler AJ, Burren OS, Stefana MI, Todd JA. Approaches and advances in the genetic  
827 causes of autoimmune disease and their implications. *Nat Immunol*. 2018.
- 828 22. Tehranchi AK, Myrthil M, Martin T, Hie BL, Golan D, Fraser HB. Pooled ChIP-Seq Links Variation in  
829 Transcription Factor Binding to Complex Disease Risk. *Cell*. 2016;165(3):730-41.
- 830 23. Pelikan RC, Kelly JA, Fu Y, Lareau CA, Tessneer KL, Wiley GB, et al. Enhancer histone-QTLs are  
831 enriched on autoimmune risk haplotypes and influence gene expression within chromatin networks.  
832 *Nature communications*. 2018;9(1):2905.
- 833 24. Degner JF, Pai AA, Pique-Regi R, Veyrieras J-B, Gaffney DJ, Pickrell JK, et al. DNase I sensitivity QTLs

- 834 are a major determinant of human expression variation. *Nature*. 2012;482(7385):390-4.
- 835 25. Gate RE, Cheng CS, Aiden AP, Siba A, Tabaka M, Lituiev D, et al. Genetic determinants of co-  
836 accessible chromatin regions in activated T cells across humans. *Nat Genet*. 2018;50(8):1140-50.
- 837 26. Li G, Martinez-Bonet M, Wu D, Yang Y, Cui J, Nguyen HN, et al. High-throughput identification of  
838 noncoding functional SNPs via type IIS enzyme restriction. *Nat Genet*. 2018;50(8):1180-8.
- 839 27. van Arensbergen J, Pagie L, FitzPatrick VD, de Haas M, Baltissen MP, Comoglio F, et al. High-  
840 throughput identification of human SNPs affecting regulatory element activity. *Nat Genet*.  
841 2019;51(7):1160-9.
- 842 28. Boyd M, Thodberg M, Vitezic M, Bornholdt J, Vitting-Seerup K, Chen Y, et al. Characterization of  
843 the enhancer and promoter landscape of inflammatory bowel disease from human colon biopsies.  
844 *Nature communications*. 2018;9(1):1661.
- 845 29. Rozman J, Rathkolb B, Oestereicher MA, Schutt C, Ravindranath AC, Leuchtenberger S, et al.  
846 Identification of genetic elements in metabolism by high-throughput mouse phenotyping. *Nature*  
847 *communications*. 2018;9(1):288.
- 848 30. Wells A, Kopp N, Xu X, O'Brien DR, Yang W, Nehorai A, et al. The anatomical distribution of genetic  
849 associations. *Nucleic Acids Research*. 2015;43(22):10804-20.
- 850 31. Piñero J, Bravo À, Queralt-Rosinach N, Gutiérrez-Sacristán A, Deu-Pons J, Centeno E, et al.  
851 DisGeNET: a comprehensive platform integrating information on human disease-associated genes and  
852 variants. *Nucleic Acids Research*. 2017;45(D1):D833-D9.
- 853 32. Zhu Z, Zhang F, Hu H, Bakshi A, Robinson MR, Powell JE, et al. Integration of summary data from  
854 GWAS and eQTL studies predicts complex trait gene targets. *Nat Genet*. 2016;48(5):481-7.
- 855 33. Manni M, Gupta S, Ricker E, Chinenov Y, Park SH, Shi M, et al. Regulation of age-associated B cells  
856 by IRF5 in systemic autoimmunity. *Nature Immunology*. 2018;19(4):407-19.
- 857 34. Tang Z, Luo OJ, Li X, Zheng M, Zhu JJ, Szalaj P, et al. CTCF-Mediated Human 3D Genome Architecture  
858 Reveals Chromatin Topology for Transcription. *Cell*. 2015;163(7):1611-27.
- 859 35. Dong SS, Guo Y, Yao S, Chen YX, He MN, Zhang YJ, et al. Integrating regulatory features data for  
860 prediction of functional disease-associated SNPs. *Briefings in bioinformatics*. 2019;20(1):26-32.
- 861 36. Yao S, Guo Y, Dong S-S, Hao R-H, Chen X-F, Chen Y-X, et al. Regulatory element-based prediction  
862 identifies new susceptibility regulatory variants for osteoporosis. *Human genetics*. 2017;136(8):963-74.
- 863 37. Dong SS, Guo Y, Zhu DL, Chen XF, Wu XM, Shen H, et al. Epigenomic elements analyses for  
864 promoters identify ESRRG as a new susceptibility gene for obesity-related traits. *International journal*  
865 *of obesity (2005)*. 2016;40(7):1170-6.
- 866 38. Guo Y, Dong SS, Chen XF, Jing YA, Yang M, Yan H, et al. Integrating Epigenomic Elements and GWASs  
867 Identifies BDNF Gene Affecting Bone Mineral Density and Osteoporotic Fracture Risk. *Scientific reports*.  
868 2016;6:30558.
- 869 39. Ye J, Tucker NR, Weng LC, Clauss S, Lubitz SA, Ellinor PT. A Functional Variant Associated with Atrial  
870 Fibrillation Regulates PITX2c Expression through TFAP2a. *American journal of human genetics*.  
871 2016;99(6):1281-91.
- 872 40. Small KS, Todorovic M, Civelek M, El-Sayed Moustafa JS, Wang X, Simon MM, et al. Regulatory  
873 variants at KLF14 influence type 2 diabetes risk via a female-specific effect on adipocyte size and body  
874 composition. *Nat Genet*. 2018;50(4):572-80.
- 875 41. Javierre BM, Burren OS, Wilder SP, Kreuzhuber R, Hill SM, Sewitz S, et al. Lineage-Specific Genome  
876 Architecture Links Enhancers and Non-coding Disease Variants to Target Gene Promoters. *Cell*.  
877 2016;167(5):1369-84.e19.
- 878 42. Mumbach MR, Satpathy AT, Boyle EA, Dai C, Gowen BG, Cho SW, et al. Enhancer connectome in  
879 primary human cells identifies target genes of disease-associated DNA elements. *Nat Genet*.  
880 2017;49(11):1602-12.
- 881 43. Martin P, McGovern A, Orozco G, Duffus K, Yarwood A, Schoenfelder S, et al. Capture Hi-C reveals  
882 novel candidate genes and complex long-range interactions with related autoimmune risk loci. *Nature*  
883 *communications*. 2015;6:10069.
- 884 44. Dao LTM, Galindo-Albarrán AO, Castro-Mondragon JA, Andrieu-Soler C, Medina-Rivera A, Souaid  
885 C, et al. Genome-wide characterization of mammalian promoters with distal enhancer functions. *Nature*  
886 *Genetics*. 2017;49:1073.
- 887 45. Pérez-García A, Marina-Zárate E, Álvarez-Prado ÁF, Ligos JM, Galjart N, Ramiro AR. CTCF  
888 orchestrates the germinal centre transcriptional program and prevents premature plasma cell  
889 differentiation. *Nature communications*. 2017;8:16067.
- 890 46. Nelson MR, Tipney H, Painter JL, Shen J, Nicoletti P, Shen Y, et al. The support of human genetic

- 891 evidence for approved drug indications. *Nature Genetics*. 2015;47(8):856-60.
- 892 47. Okada Y, Wu D, Trynka G, Raj T, Terao C, Ikari K, et al. Genetics of rheumatoid arthritis contributes  
893 to biology and drug discovery. *Nature*. 2014;506(7488):376-81.
- 894 48. Fang H, Beckmann G, Bountra C, Bowness P, Burgess-Brown N, Carpenter L, et al. A genetics-led  
895 approach defines the drug target landscape of 30 immune-related traits. *Nature Genetics*.  
896 2019;51(7):1082-91.
- 897 49. Marino F, Cosentino M. Multiple sclerosis: Repurposing dopaminergic drugs for MS--the evidence  
898 mounts. *Nature reviews Neurology*. 2016;12(4):191-2.
- 899 50. Cuperus FJ, Halilbasic E, Trauner M. Fibrate treatment for primary biliary cirrhosis. *Current opinion*  
900 *in gastroenterology*. 2014;30(3):279-86.
- 901 51. Liu JZ, van Sommeren S, Huang H, Ng SC, Alberts R, Takahashi A, et al. Association analyses identify  
902 38 susceptibility loci for inflammatory bowel disease and highlight shared genetic risk across  
903 populations. *Nat Genet*. 2015;47(9):979-86.
- 904 52. Ji S-G, Juran BD, Mucha S, Folseraas T, Jostins L, Melum E, et al. Genome-wide association study of  
905 primary sclerosing cholangitis identifies new risk loci and quantifies the genetic relationship with  
906 inflammatory bowel disease. *Nature Genetics*. 2016;49:269.
- 907 53. Wang K, Li M, Hakonarson H. ANNOVAR: functional annotation of genetic variants from high-  
908 throughput sequencing data. *Nucleic Acids Research*. 2010;38(16):e164-e.
- 909 54. Purcell S, Neale B, Todd-Brown K, Thomas L, Ferreira MAR, Bender D, et al. PLINK: A Tool Set for  
910 Whole-Genome Association and Population-Based Linkage Analyses. *The American Journal of Human*  
911 *Genetics*. 2007;81(3):559-75.
- 912 55. Sudmant PH, Rausch T, Gardner EJ, Handsaker RE, Abyzov A, Huddleston J, et al. An integrated map  
913 of structural variation in 2,504 human genomes. *Nature*. 2015;526(7571):75-81.
- 914 56. Roadmap Epigenomics C, Kundaje A, Meuleman W, Ernst J, Bilenky M, Yen A, et al. Integrative  
915 analysis of 111 reference human epigenomes. *Nature*. 2015;518(7539):317-30.
- 916 57. Consortium. TEP. An integrated encyclopedia of DNA elements in the human genome. *Nature*.  
917 2012;489(7414):57-74.
- 918 58. Quinlan AR, Hall IM. BEDTools: a flexible suite of utilities for comparing genomic features.  
919 *Bioinformatics*. 2010;26(6):841-2.
- 920 59. Sun BB, Maranville JC, Peters JE, Stacey D, Staley JR, Blackshaw J, et al. Genomic atlas of the human  
921 plasma proteome. *Nature*. 2018;558(7708):73-9.
- 922 60. Smemo S, Tena JJ, Kim K-H, Gamazon ER, Sakabe NJ, Gomez-Marin C, et al. Obesity-associated  
923 variants within FTO form long-range functional connections with IRX3. *Nature*. 2014;507(7492):371-5.
- 924 61. Giambartolomei C, Vukcevic D, Schadt EE, Franke L, Hingorani AD, Wallace C, et al. Bayesian test  
925 for colocalisation between pairs of genetic association studies using summary statistics. *PLoS Genet*.  
926 2014;10(5):e1004383.
- 927 62. Guo C, Sieber KB, Esparza-Gordillo J, Hurler MR, Song K, Yeo AJ, et al. Identification of putative  
928 effector genes across the GWAS Catalog using molecular quantitative trait loci from 68 tissues and cell  
929 types. *bioRxiv*. 2019:808444.
- 930 63. Tachmazidou I, Hatzikotoulas K, Southam L, Esparza-Gordillo J, Haberland V, Zheng J, et al.  
931 Identification of new therapeutic targets for osteoarthritis through genome-wide analyses of UK  
932 Biobank data. *Nat Genet*. 2019;51(2):230-6.
- 933 64. Bailey TL, Boden M, Buske FA, Frith M, Grant CE, Clementi L, et al. MEME Suite: Tools for motif  
934 discovery and searching. *Nucleic Acids Research*. 2009;37(SUPPL. 2):W202-W8.
- 935 65. Khan A, Fornes O, Stigliani A, Gheorghe M, Castro-Mondragon JA, van der Lee R, et al. JASPAR 2018:  
936 update of the open-access database of transcription factor binding profiles and its web framework.  
937 *Nucleic acids research*. 2018;46(D1):D260-d6.
- 938 66. Kulakovskiy IV, Vorontsov IE, Yevshin IS, Sharipov RN, Fedorova AD, Rumynskiy EI, et al.  
939 HOCOMOCO: towards a complete collection of transcription factor binding models for human and  
940 mouse via large-scale ChIP-Seq analysis. *Nucleic acids research*. 2018;46(D1):D252-d9.
- 941 67. Pachkov M, Balwierz PJ, Arnold P, Ozonov E, van Nimwegen E. SwissRegulon, a database of  
942 genome-wide annotations of regulatory sites: recent updates. *Nucleic Acids Research*.  
943 2013;41(D1):D214-D20.
- 944 68. Jolma A, Yan J, Whittington T, Toivonen J, Nitta Kazuhiro R, Rastas P, et al. DNA-Binding Specificities  
945 of Human Transcription Factors. *Cell*. 2013;152(1-2):327-39.
- 946 69. Schmiedel BJ, Singh D, Madrigal A, Valdovino-Gonzalez AG, White BM, Zapardiel-Gonzalo J, et al.  
947 Impact of Genetic Polymorphisms on Human Immune Cell Gene Expression. *Cell*. 2018;175(6):1701-

- 948 15.e16.
- 949 70. Yu G, Wang LG, Han Y, He QY. clusterProfiler: an R package for comparing biological themes among  
950 gene clusters. *Omics : a journal of integrative biology*. 2012;16(5):284-7.
- 951 71. The Aric I. The Atherosclerosis Risk in Communities (ARIC) Study: design and objectives. The ARIC  
952 investigators. *American journal of epidemiology*. 1989;129(4):687-702.
- 953 72. Yang J, Lee SH, Goddard ME, Visscher PM. GCTA: A Tool for Genome-wide Complex Trait Analysis.  
954 *The American Journal of Human Genetics*. 2011;88(1):76-82.
- 955 73. Wishart DS, Feunang YD, Guo AC, Lo EJ, Marcu A, Grant JR, et al. DrugBank 5.0: a major update to  
956 the DrugBank database for 2018. *Nucleic acids research*. 2018;46(D1):D1074-d82.
- 957 74. Li YH, Yu CY, Li XX, Zhang P, Tang J, Yang Q, et al. Therapeutic target database update 2018: enriched  
958 resource for facilitating bench-to-clinic research of targeted therapeutics. *Nucleic acids research*.  
959 2018;46(D1):D1121-d7.
- 960 75. Koscielny G, An P, Carvalho-Silva D, Cham JA, Fumis L, Gasparyan R, et al. Open Targets: a platform  
961 for therapeutic target identification and validation. *Nucleic acids research*. 2017;45(D1):D985-D94.
- 962 76. Cotto KC, Wagner AH, Feng YY, Kiwala S, Coffman AC, Spies G, et al. DGIdb 3.0: a redesign and  
963 expansion of the drug-gene interaction database. *Nucleic acids research*. 2018;46(D1):D1068-D73.
- 964 77. Nguyen DT, Mathias S, Bologna C, Brunak S, Fernandez N, Gaulton A, et al. Pharos: Collating protein  
965 information to shed light on the druggable genome. *Nucleic acids research*. 2017;45(D1):D995-D1002.
- 966 78. Finan C, Gaulton A, Kruger FA, Lumbers RT, Shah T, Engmann J, et al. The druggable genome and  
967 support for target identification and validation in drug development. *Science Translational Medicine*.  
968 2017;9(383).
- 969

## 970 Figures Legends

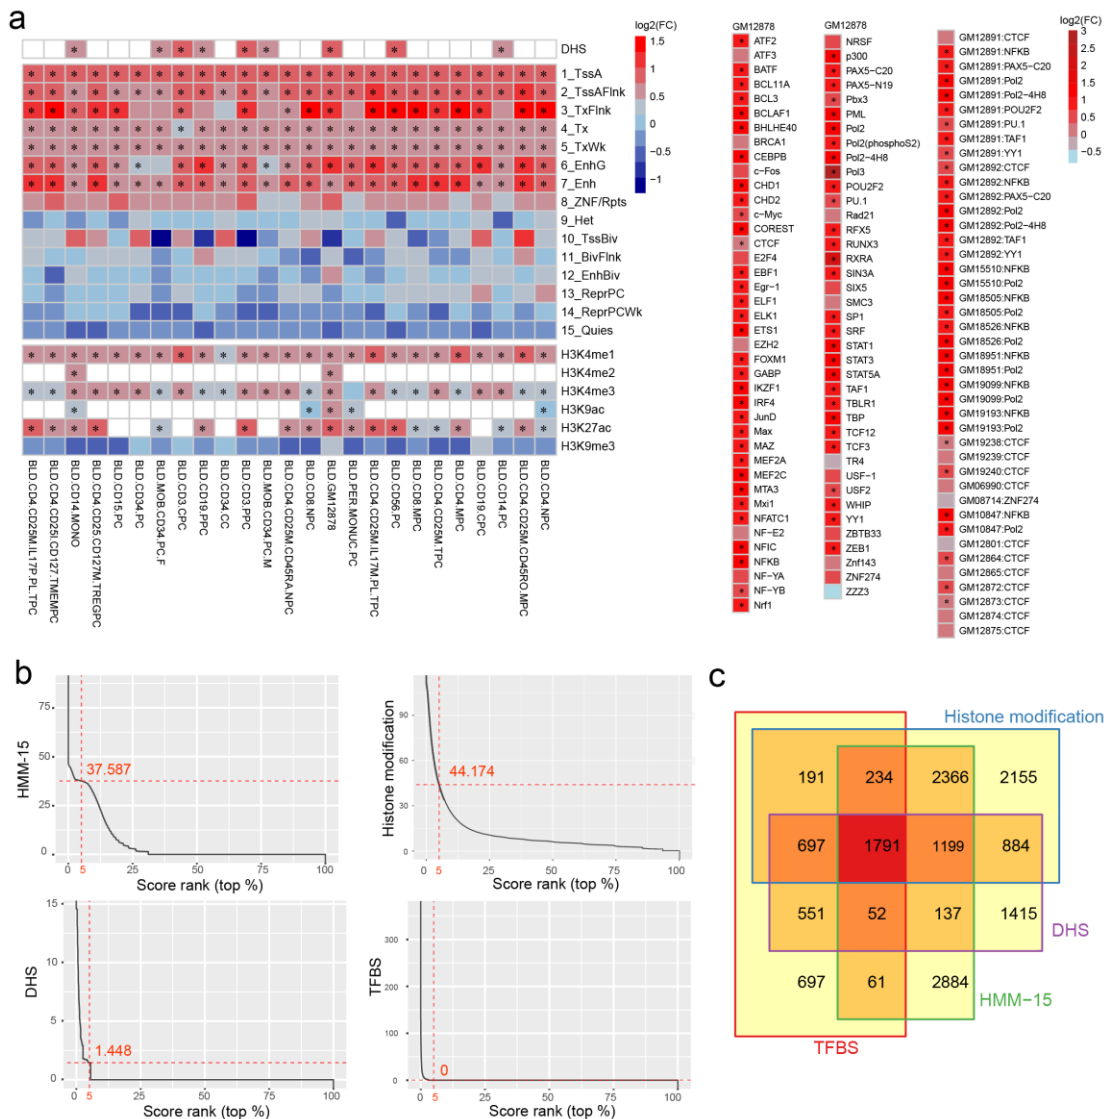

971

## 972 Figure 1. Epigenetic functional scoring for autoimmune SNPs

973 (a) Heatmap showing epigenetic feature enrichment analysis on 606 epigenetic data  
 974 from 47 blood cell types across four epigenetic groups (Left: DHS, HMM-15, histone  
 975 modification. Right: TFBS) between all autoimmune positive SNPs and background  
 976 SNPs. FC: fold enrichment on each feature comparing autoimmune positive SNPs with  
 977 background SNPs. Red color represents feature with higher enrichment in autoimmune  
 978 positive SNPs ( $\text{Log}_2\text{FC} > 0$ ). All significant and active features (Bonferroni adjusted  $P$   
 979  $< 0.05$ ,  $\text{FC} > 1$ ) selected for SNP scoring were marked with asterisk. Enrichment  
 980 analysis was performed using Fisher's exact test. (c) Ranking plot for scores of all  
 981 autoimmune negative SNPs within four epigenetic categories, with red dashed line



982 represents top 5% ranked value. (d) Venn diagram showing count of autoimmune SNPs  
 983 with functionality support in each of four epigenetic categories by comparing the  
 984 scoring value with top 5% ranked value of all negative autoimmune SNPs in (a). See  
 985 also Figure S1.  
 986  
 987

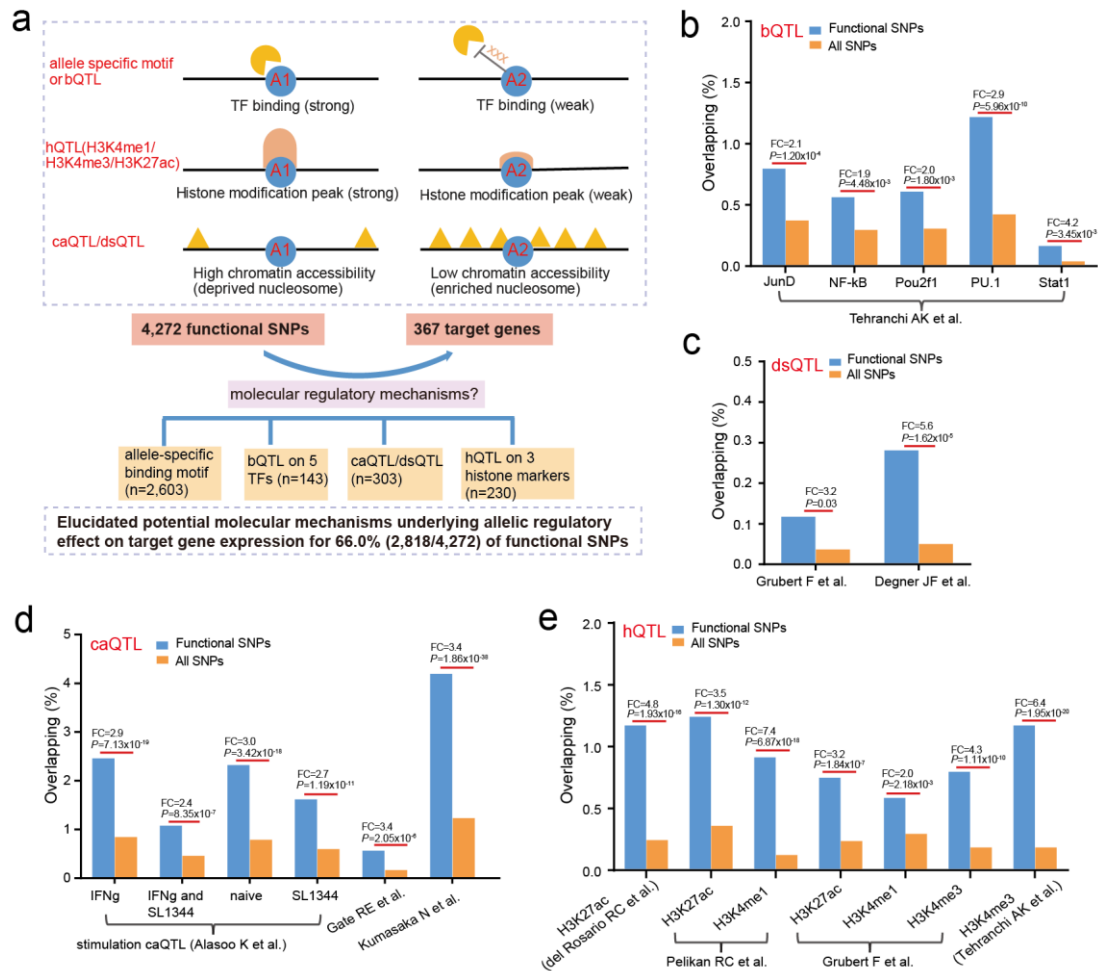

988

989 **Figure 2. Dissecting allelic regulatory mechanisms underlying functional SNPs**

990 (a) Schematic showing several potential molecular-level regulatory mechanisms  
 991 underlying functional autoimmune SNPs (upper) and summary of corresponding SNP  
 992 counts (bottom). (b-e) Functional enrichment for each collected molecular QTL data on  
 993 functional SNPs compared with all positive autoimmune SNPs. Fisher's exact test was  
 994 performed in b-e, with fold enrichment and *P*-value shown.

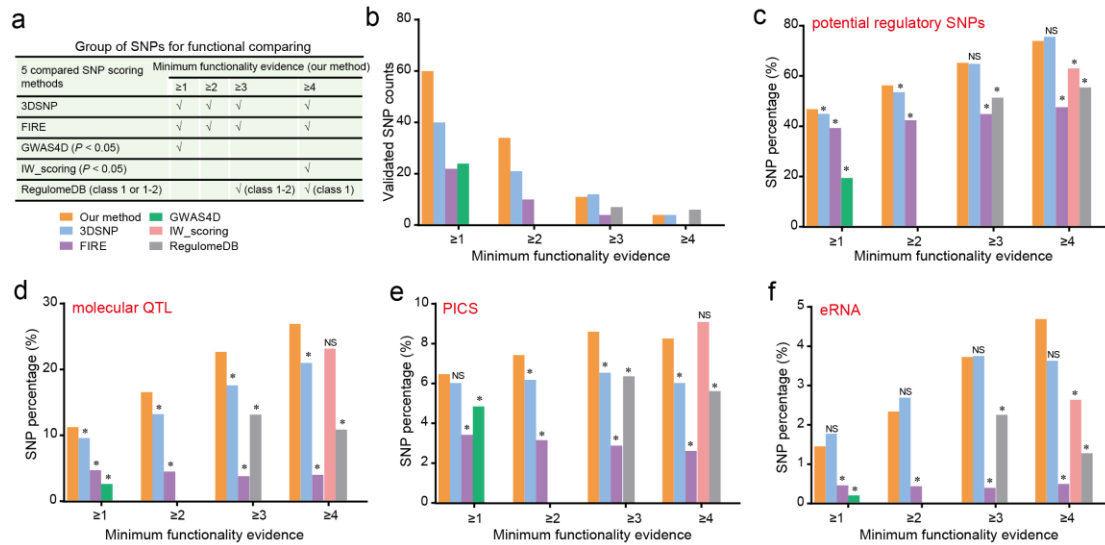

995

996 **Figure 3. Comparing epigenetic functional scoring with other methods**

997 (a) Description of top-scored SNPs sets from each method for functional comparing in  
 998 b-f, which are marked by different colors (bottom). (b) Comparison of experimentally  
 999 validated functional SNPs between our method and other five methods from a high-  
 1000 throughput screen assay in mononuclear cells [26]. (c-f) Comparison of percentage of  
 1001 annotated SNPs within different regulatory evidence between our method and other five  
 1002 methods, including (c) potential regulatory SNPs with predicted target gene by  
 1003 combining cis-QTL and chromatin interaction analysis, (d) potential functional SNPs  
 1004 with significant molecular QTL (bQTL, hQTL, dsQTL or caQTL) association, (e)  
 1005 casual autoimmune associated SNPs identified by PICS approach [18], and (f) potential  
 1006 regulatory SNPs within eRNA detected from IBD patients [28]. Fisher's exact test was  
 1007 performed in c-f with asterisk represented significant higher enrichment on our method  
 1008 (FC > 1,  $P < 0.05$ ). NS, not significant. See also Figure S2.

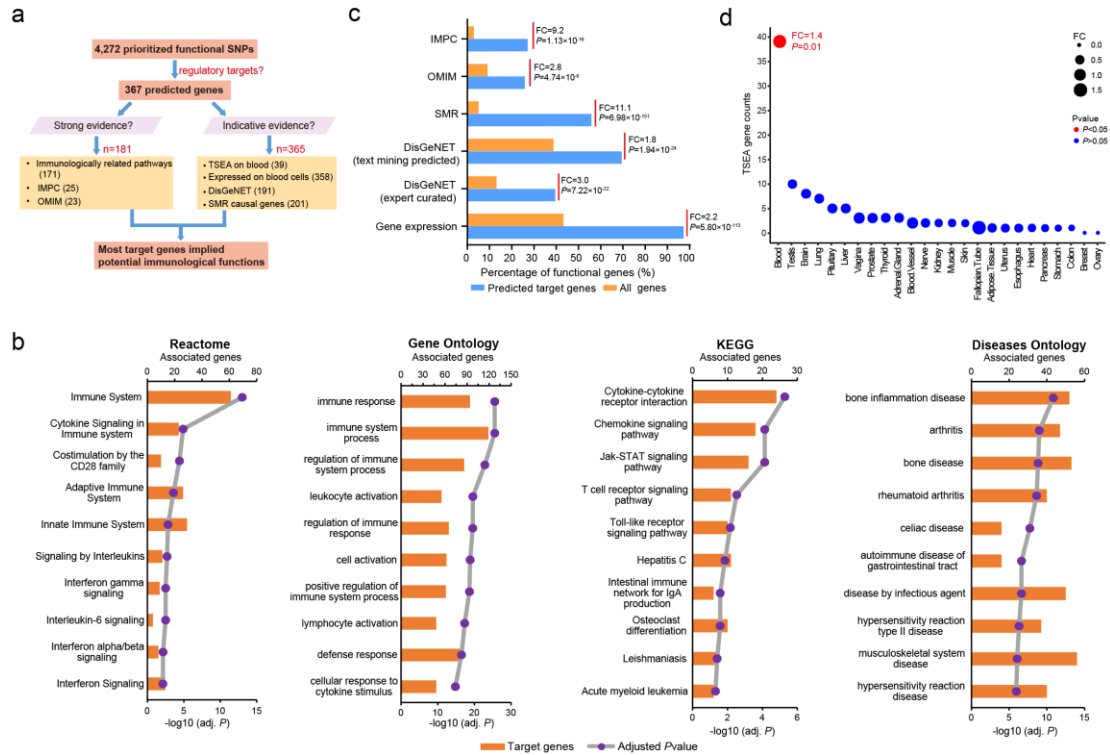

1009

1010 **Figure 4. Immunological function analysis for predicted target genes**

1011 (a) Summary of multiple immunologically related functions for predicted target genes.  
1012 (b) Top 10 significant biological pathways on predicted target genes. Both *P*-value (line  
1013 chart) and gene counts (bar chart) are shown. (c) Functional enrichment for potential  
1014 immunologically related gene set with different functional evidence between predicted  
1015 target genes and whole genome genes. Enrichment analysis was performed using  
1016 Fisher's exact test. (d) Tissue Specific Expression Analysis (TSEA) for predicted target  
1017 genes on 25 diverse tissues, with dot size representing gene counts and dot color  
1018 indicating significance level (*P*-value) using Fisher's exact test. Only one significant  
1019 (*P* < 0.05) tissue (blood) was detected.

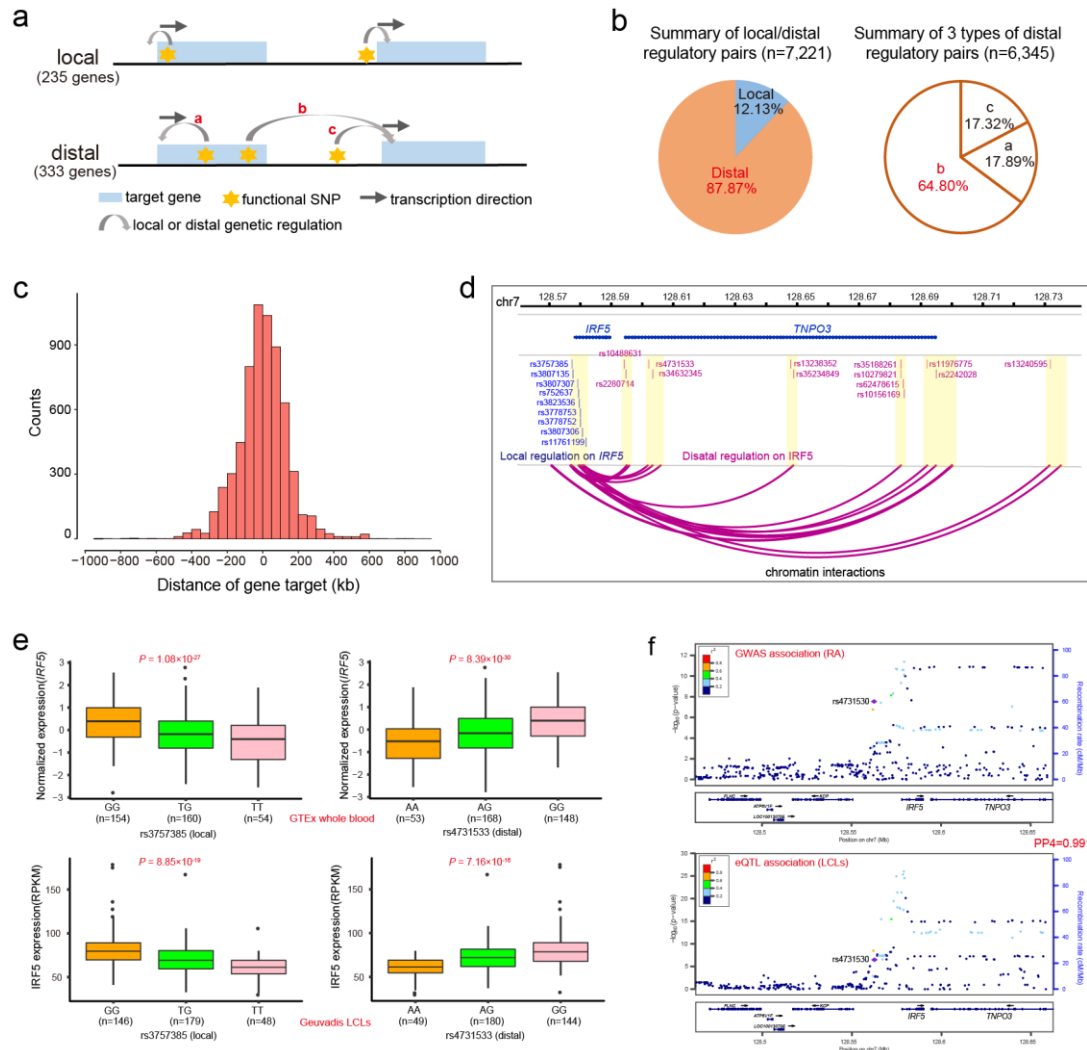

1020

1021 **Figure 5. Prevailing long-range regulation linking functional SNPs to distal gene**  
 1022 **targets**

1023 (a) Schematic showing different regulatory models underlying prioritized functional  
 1024 autoimmune SNPs and gene targets. (b) Pie chart showing comparison between local  
 1025 and distal regulatory pairs (left), as well as between 3 types of distal regulatory pairs  
 1026 (right) in a. (c) Counts of SNP-gene pairs at different distance (kb). (d-f) *IRF5-TNPO3*  
 1027 region example showing that multiple functional autoimmune SNPs located within  
 1028 other gene regulated distal target gene expression via long-range chromatin interactions.  
 1029 The regulatory evidence including both (d) chromatin interactions, (e) cis-QTL  
 1030 association (one local example SNP and another distal example SNP were shown) and  
 1031 (f) colocalization between GWAS association on RA and *IRF5* cis-eQTL association in

1032 LCLs. Genomic annotation and chromatin interaction at *IRF5* locus were visualized  
 1033 using WashU Epigenome Browser.  
 1034

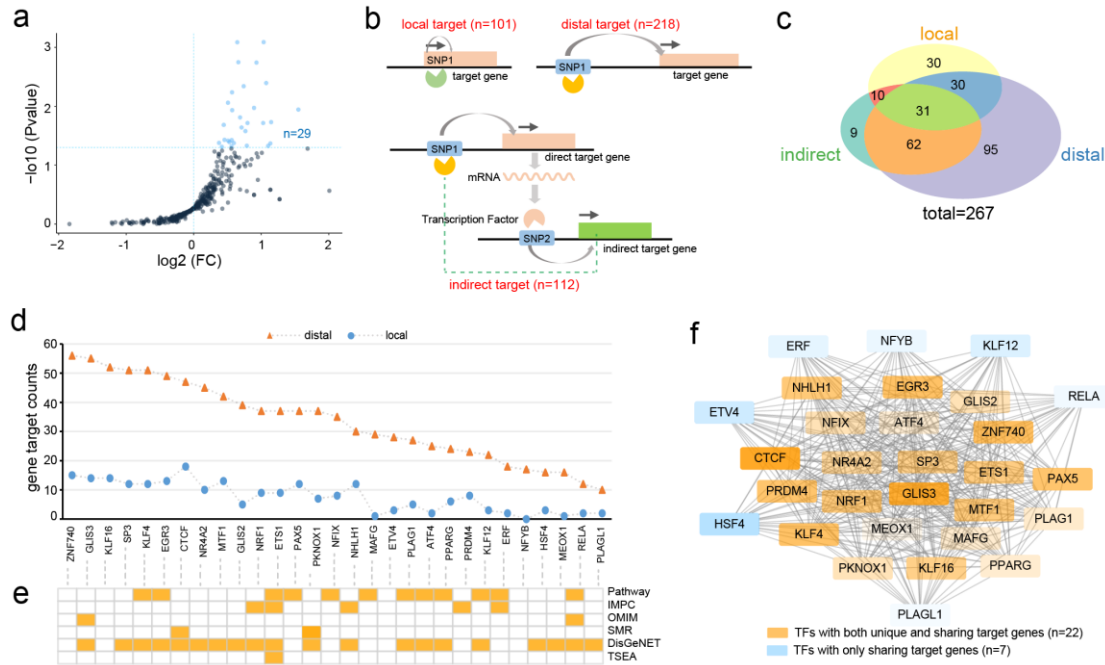

1035

1036 **Figure 6. Identifying key TFs mediating autoimmune genetic regulatory network**  
 1037 (a) Scatter plot showing fold enrichment (FC) and significance level for enrichment in  
 1038 366 predicted motif TFs between prioritized functional SNPs and all autoimmune SNPs.  
 1039 Nominally significantly higher enriched TFs ( $FC > 1$ ,  $P < 0.05$ ) are marked in blue. (b)  
 1040 Schematic showing three TF-target gene regulatory models. The gray arrow indicates  
 1041 SNP-target gene interaction. (c) Venn diagram showing counts of three types of target  
 1042 genes on significant TFs in (b). (d) Comparison between distal and local target genes  
 1043 on significant TFs. (e) Annotated immunological functions on significant TFs. (f)  
 1044 Pervasive sharing of regulatory target genes between different significant TFs. The  
 1045 orange rectangle represented 22 TFs shared all target genes with the rest (blue) of TFs,  
 1046 which might indicate their central regulatory roles. The transparency indicated counts  
 1047 of regulatory target genes, with CTCF mediated the most target genes ( $n = 113$ ).

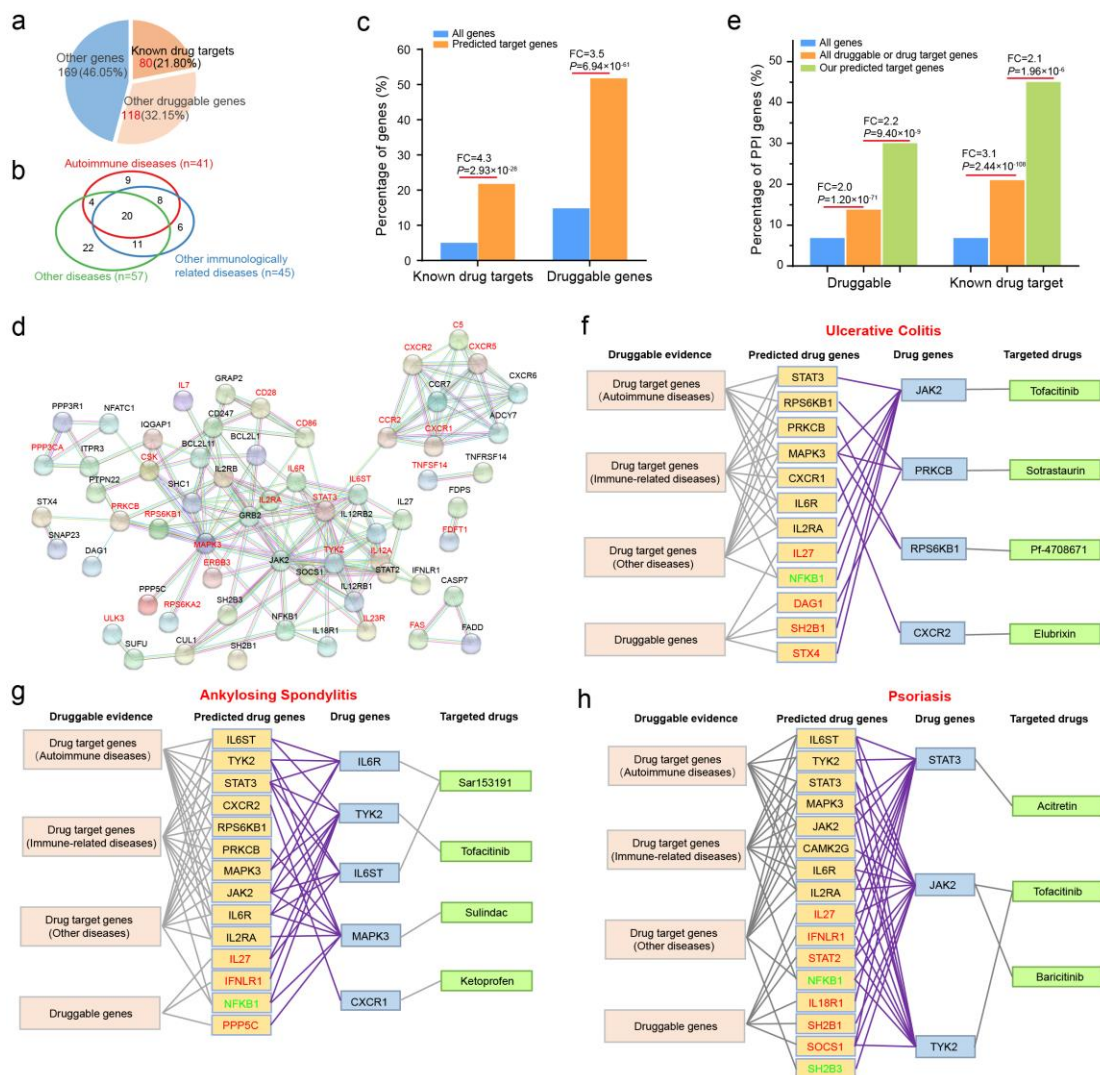

1048

1049 **Figure 7. Predicted new drug targets with potential repurposing opportunities for**  
 1050 **three autoimmune diseases**

1051 (a) Pie chart showing gene count and percentage among predicted target genes for either  
 1052 known drug targets with indications or predicted druggable genes or others. (b) Venn  
 1053 diagram showing sharing counts of drug target genes with indications on either  
 1054 autoimmune diseases, other immunologically related diseases or other diseases (Table  
 1055 S12 for detail). (c) Functional enrichment analysis for either known drug target or  
 1056 predicted druggable genes on our predicted target genes compared with all genome  
 1057 genes using Fisher's exact test. (d) PPI (score > 0.9) between autoimmune-drug target  
 1058 genes (marked in red) and other drug target or druggable genes. PPI plot was from  
 1059 STRING database by querying online. (e) Functional enrichment analysis showing  
 1060 percentage of genes showing strong PPI (score > 0.9) with autoimmune-drug target

1061 genes on either predicted druggable genes or known drug target genes. The comparison  
1062 was performed between our predicted target genes (marked in green) and all druggable  
1063 or drug target genes (marked in orange), as well as between all druggable genes or drug  
1064 targets and all genome genes (marked in blue) using Fisher's exact test, respectively.  
1065 (f-h) Predicted new candidate drug targets on three autoimmune diseases. The orange  
1066 rectangle shows predicted new drug genes, with genes with known indications on other  
1067 autoimmune or non-autoimmune diseases marked in black or green and genes without  
1068 known drug target indications marked in red. See also Figure S3 and S4.

## 1069 **Supplementary Figures Legends**

### 1070 **Figure S1. Workflow of epigenetic functional scoring**

1071 The top panel shows definition for positive, background and negative autoimmune  
1072 SNPs for the following epigenetic functional scoring. Any coding, splicing or MHC  
1073 region SNPs were removed. The middle panel shows the process for functional scoring.  
1074 FC: fold enrichment. Epigenetic data in 47 blood immune cell types across four  
1075 epigenetic categories (HMM-15, histone modification, DHS, TFBS) are used for  
1076 enrichment analysis using Fisher's exact test. M1-M4 denotes annotated or unannotated  
1077 positive/background SNPs count on each epigenetic feature. A1-A4 denotes four  
1078 epigenetic categories with m1-m4 significant enriched features for scoring. The bottom  
1079 panel shows how to determine functionality support for each positive SNP. Each SNP  
1080 had four scores (n1-n4) across four epigenetic groups, which were further compared  
1081 with 5% top ranked score value of all negative SNPs (S1-S4) to determine its  
1082 functionality support. Relative to Figure 1.

1083

### 1084 **Figure S2. Comparing epigenetic functional scoring with other methods using** 1085 **experimentally validated regulatory SNPs**

1086 Comparison of experimentally validated functional SNPs between our epigenetic  
1087 functional scoring and other five methods from high-throughput screen assay in HepG2  
1088 (a) and K562 (b) cells [27]. Relative to Figure 3.

1089

### 1090 **Figure S3. Prevailing sharing of genetic disease-association and biological** 1091 **pathways on drug target genes**

1092 (a-b) Count of (a) autoimmune drug target genes or (b) other drug target and predicted  
1093 druggable genes associated with paired autoimmune diseases, with genes associated  
1094 with individual disease shown in diagonal line. Disease association on gene targets are  
1095 derived from their upstream functional SNPs. (c) Counts of shared immunological  
1096 related pathways between 41 known autoimmune-drug target genes (row) and all 198  
1097 drug target or druggable genes (column). Pathways were manually curated from all



1098 annotated biological terms (GO, KEGG, DO, Reactome) on predicted target genes  
1099 (Table S9). Relative to Figure 7.

1100

1101 **Figure S4. Predicted new potential drug targets for four autoimmune diseases**

1102 The yellow rectangle shows predicted new drug genes for four autoimmune diseases  
1103 which had strong PPI with known drug target genes (blue). All predicted drug genes  
1104 had known indications on other autoimmune diseases or non-autoimmune diseases.

1105 Relative to Figure 7.

1106

1107 **Figure S5. Flowchart of fnGWAS pipeline**

1108 The blue rectangle summarized five main analysis steps of fnGWAS pipeline, with aim  
1109 for each step shown (Step 1-5). For each analysis step, the input data (represented by  
1110 cylinder) and simplified example summarized output result (represented by yellow  
1111 table) are shown, respectively. By default, fnGWAS begins with an epigenetic  
1112 functional scoring pipeline (Step1) using all susceptible SNPs associated with any  
1113 interested diseases/traits as input, which outputs functional scores and functionality  
1114 support for all positive SNPs (see detailed workflow for step 1 in Figure S1). Target  
1115 gene prediction were then employed for all positive SNPs with functionality support  
1116 (Step 2). Downstream functional analysis were then performed predicted target genes  
1117 and their regulatory functional SNPs (Step 3-5). Alternatively, each step of fnGWAS  
1118 can be run independently, which support any user-defined input data. The whole  
1119 pipeline including input annotation data are free available at  
1120 <https://github.com/xjtugenetics/fnGWAS> or <http://fngwas.online/download.php>.

1121

## 1122 **Supplementary Tables**

1123 **Table S1.** Summary of datasets for autoimmune SNPs collection

1124 **Table S2.** Significantly enriched active epigenetic features selected for epigenetic  
1125 functional scoring

1126 **Table S3.** Epigenetic functional scores on all positive autoimmune SNPs

1127 **Table S4.** Summary of cis-QTLs and chromatin interactions datasets for target gene  
1128 prediction

1129 **Table S5.** Predicted regulatory target genes on prioritized potential functional SNPs

1130 **Table S6.** Colocalization between GWAS and cis-QTL association for predicted target  
1131 genes

1132 **Table S7.** Summary of intermediate molecular QTL datasets

1133 **Table S8.** Potential molecular regulatory mechanisms underlying functional  
1134 autoimmune SNPs

1135 **Table S9.** Summary of immunologically related functions for target genes

1136 **Table S10.** Potential causal autoimmune target genes identified by SMR

1137 **Table S11.** Regulatory target genes and immunologically related functions for  
1138 significantly enriched TFs

1139 **Table S12.** known drug target genes with clinical indications

1140 **Table S13.** Prioritized candidate druggable genes

1141 **Table S14.** Predicted new potential drug target or drug repurposing genes on  
1142 autoimmune diseases

1143 **Table S15.** Comparison between fnGWAS and other representative scoring approaches
